# Supplementary material for: Long-term safety and efficacy of upadacitinib versus adalimumab in patients with rheumatoid arthritis: 5-year data from the phase 3, randomised SELECT-COMPARE study
Source: PubMed Central journal article supplement — RMD Open. 2024 May 28;10(2):e004007. doi: 10.1136/rmdopen-2023-004007 (PMC11138271; doi:10.1136/rmdopen-2023-004007), 2024-05-28
Supplement: rmdopen-2023-004007supp001.pdf [file rmdopen-2023-004007supp001.pdf]

## Supplementary Materials

**Supplementary Table S1** Baseline demographics and clinical characteristics

| Characteristics                        | PBO<br>(n=651) | UPA 15 mg QD<br>(n=651) | ADA 40 mg EOW<br>(n=327) |
|----------------------------------------|----------------|-------------------------|--------------------------|
| Female, n (%)                          | 512 (79)       | 521 (80)                | 259 (79)                 |
| Disease duration, years                | 8 ± 8          | 8 ± 8                   | 8 ± 8                    |
| Age, years                             | 54 ± 12        | 54 ± 12                 | 54 ± 12                  |
| RF+ and/or ACPA+, n (%)                | 571 (88)       | 566 (87)                | 288 (88)                 |
| MTX dose, mg/week                      | 16.8 ± 3.8     | 17.0 ± 4.2              | 17.1 ± 3.8               |
| Prior bDMARD exposure, n (%)           | 63 (10)        | 54 (8)                  | 34 (10)                  |
| Oral GC use, n (%)                     | 392 (60)       | 388 (60)                | 202 (62)                 |
| Dose, mg*                              | 6.3 ± 2.4      | 6.2 ± 2.3               | 6.5 ± 2.4                |
| TJC68                                  | 26 ± 14        | 26 ± 15                 | 26 ± 15                  |
| SJC66                                  | 16 ± 9         | 17 ± 10                 | 16 ± 9                   |
| PtGA (100-mm VAS)                      | 64 ± 21        | 64 ± 22                 | 66 ± 21                  |
| PhGA (100-mm VAS)                      | 66 ± 18        | 66 ± 17                 | 65 ± 18                  |
| Pain (100-mm VAS)                      | 65 ± 21        | 66 ± 21                 | 66 ± 21                  |
| hsCRP, mg/L                            | 18 ± 22        | 18 ± 22                 | 20 ± 22                  |
| DAS28(CRP) (scale 0–10)                | 5.8 ± 0.9      | 5.8 ± 1.0               | 5.9 ± 1.0                |
| DAS28(ESR) (scale 0–10)                | 6.5 ± 1.0      | 6.4 ± 1.0               | 6.5 ± 1.0                |
| CDAI (scale 0–76)                      | 40 ± 13        | 40 ± 13                 | 40 ± 13                  |
| HAQ-DI (scale 0–3)                     | 1.6 ± 0.6      | 1.6 ± 0.6               | 1.6 ± 0.6                |
| mTSS (scale 0–448)                     | 36 ± 52        | 34 ± 50                 | 35 ± 47                  |
| Erosion score (scale 0–168)            | 17 ± 27        | 17 ± 26                 | 15 ± 23                  |
| JSN score (scale 0–280)                | 19 ± 26        | 18 ± 25                 | 19 ± 26                  |
| Duration of morning stiffness, minutes | 142 ± 170      | 142 ± 188               | 146 ± 185                |
| FACIT-F score (scale 0–52)             | 27 ± 11        | 27 ± 11                 | 26 ± 11                  |
| SF-36 PCS score (scale 0–100)          | 33 ± 7         | 33 ± 7                  | 32 ± 7                   |

Reproduced from Fleischmann et al. *Arthritis Rheumatol* 2019;17:1788–1800. © 2019, American College of Rheumatology.

Data are mean  $\pm$  standard deviation unless stated otherwise. \*Based on prednisone or equivalent daily dose. ADA, adalimumab; ACPA+, anti-cyclic citrullinated peptide positive; bDMARD, biologic disease-modifying antirheumatic drug; CDAI, Clinical Disease Activity Index; DAS28(CRP), 28-joint Disease Activity Score based on C-reactive protein; DAS28(ESR), 28-joint Disease Activity Score using erythrocyte sedimentation rate; EOW, every other week; FACIT-F, Functional Assessment of Chronic Illness Therapy – Fatigue; SF-36 PCS, 36-item Short Form physical component summary; GC, glucocorticoid; HAQ-DI, Health Assessment Questionnaire – Disability Index; hsCRP, high-sensitivity C-reactive protein; JSN, joint space narrowing; MTX, methotrexate; mTSS, modified Total Sharp Score; PBO, placebo; PhGA, physician’s global assessment of disease activity; PtGA, patient’s global assessment of disease activity; QD once daily; RF+, rheumatoid factor positive; SJC66, swollen joint count based on 66 joints; TJC68, tender joint count based on 68 joints; UPA, upadacitinib, VAS, visual analogue scale.

| <b>Supplementary Table S2</b> Observed COVID-19 infections in patients receiving upadacitinib and adalimumab |                                      |                                      |
|--------------------------------------------------------------------------------------------------------------|--------------------------------------|--------------------------------------|
| <b>Parameter, n (%)</b>                                                                                      | <b>Any UPA 15 mg QD<br/>(n=1417)</b> | <b>Any ADA 40 mg EOW<br/>(n=579)</b> |
| COVID-19 infection                                                                                           | 202 (14.3)                           | 59 (10.2)                            |
| Serious                                                                                                      | 52 (25.7)                            | 6 (1.0)                              |
| Fatal                                                                                                        | 10 (5.0)                             | 0                                    |
| Age at baseline, years                                                                                       |                                      |                                      |
| Mean (SD)                                                                                                    | 51.0 (11.4)                          | 51.5 (10.2)                          |
| Median (min, max)                                                                                            | 51.0 (20, 82)                        | 54.0 (21, 70)                        |
| Geographical region                                                                                          |                                      |                                      |
| North America                                                                                                | 20 (9.9)                             | 9 (15.3)                             |
| South/Central America                                                                                        | 63 (31.2)                            | 14 (23.7)                            |
| Western Europe                                                                                               | 7 (3.5)                              | 2 (3.4)                              |
| Eastern Europe                                                                                               | 94 (46.5)                            | 28 (47.5)                            |
| Asia                                                                                                         | 6 (3.0)                              | 1 (1.7)                              |
| Other                                                                                                        | 12 (5.9)                             | 5 (8.5)                              |
| Severity                                                                                                     |                                      |                                      |
| Mild                                                                                                         | 64 (31.7)                            | 18 (30.5)                            |
| Moderate                                                                                                     | 99 (49.0)                            | 37 (62.7)                            |
| Severe                                                                                                       | 39 (19.3)                            | 4 (6.8)                              |
| Infection leading to hospitalisation                                                                         |                                      |                                      |
| Yes                                                                                                          | 49 (24.3)                            | 6 (10.2)                             |
| No                                                                                                           | 27 (13.4)                            | 5 (8.5)                              |
| Missing                                                                                                      | 126 (62.4)                           | 48 (81.4)                            |
| Action taken with study drug                                                                                 |                                      |                                      |
| Dose not changed                                                                                             | 50 (24.8)                            | 23 (39.0)                            |
| Dose interrupted                                                                                             | 136 (67.3)                           | 35 (59.3)                            |
| Drug withdrawn                                                                                               | 16 (7.9)                             | 1 (1.7)                              |
| Multiple (interrupted, withdrawn)                                                                            | 0                                    | 0                                    |

Safety was assessed up to week 264, through the cut-off date of 5 October 2022. Treatment-emergent adverse events included any adverse event with an onset date on or after the first dose of study drug and up to 30 days after the last dose of placebo or UPA and 70 days for ADA, if patients discontinued prematurely. Data through 264 weeks include all patients receiving UPA or ADA, including rescue groups, with assignment based on drug exposure at the time of the event. ADA, adalimumab; EOW, every other week; QD, once daily; SD, standard deviation; UPA, upadacitinib.

| <b>Supplementary Table S3</b> Most common TEAEs through 264 weeks |                                                                  |                                                                  |
|-------------------------------------------------------------------|------------------------------------------------------------------|------------------------------------------------------------------|
| <b>EAER</b>                                                       | <b>Any UPA 15 mg QD<br/>(n=1417; PY=4496.6)<br/>E (E/100 PY)</b> | <b>Any ADA 40 mg EOW<br/>(n=579; PY=1472.4)<br/>E (E/100 PY)</b> |
| Urinary tract infection                                           | 326 (7.2)                                                        | 114 (7.7)                                                        |
| Upper respiratory tract infection                                 | 276 (6.1)                                                        | 74 (5.0)                                                         |
| Nasopharyngitis                                                   | 265 (5.9)                                                        | 75 (5.1)                                                         |
| Bronchitis                                                        | 194 (4.3)                                                        | 71 (4.8)                                                         |
| ALT elevation                                                     | 193 (4.3)                                                        | 44 (3.0)                                                         |
| CPK elevation                                                     | 179 (4.0)                                                        | 26 (1.8)                                                         |
| Hypertension                                                      | 168 (3.7)                                                        | 46 (3.1)                                                         |
| AST elevation                                                     | 156 (3.5)                                                        | 29 (2.0)                                                         |
| Worsening of RA                                                   | 151 (3.4)                                                        | 82 (5.6)                                                         |

Safety was assessed up to week 264, through the cut-off date of 5 October 2022. TEAEs included any adverse event with an onset date on or after the first dose of study drug and up to 30 days after the last dose of placebo or UPA and 70 days for ADA, if patients discontinued prematurely. Data through 264 weeks include all patients receiving UPA or ADA, including rescue groups, with assignment based on drug exposure at the time of the event. ADA, adalimumab; ALT, alanine aminotransferase; AST, aspartate aminotransferase; CPK, creatine phosphokinase; E, events, EAER, exposure-adjusted event rate; EOW, every other week; PY patient-years, QD, once daily; RA, rheumatoid arthritis; TEAE, treatment-emergent adverse event; UPA, upadacitinib.

| <b>Supplementary Table S4</b> Treatment-emergent: malignancies, adjudicated MACE and adjudicated VTE |                                                                           |                                                                           |
|------------------------------------------------------------------------------------------------------|---------------------------------------------------------------------------|---------------------------------------------------------------------------|
| <b>System organ class MedDRA 25.0 preferred term</b>                                                 | <b>Any UPA 15 mg QD<br/>(n=1417; PY=4496.6)<br/>E (E/100 PY) [95% CI]</b> | <b>Any ADA 40 mg EOW<br/>(n=579; PY=1472.4)<br/>E (E/100 PY) [95% CI]</b> |
| <b>Malignancies</b>                                                                                  |                                                                           |                                                                           |
| <b>Skin</b>                                                                                          |                                                                           |                                                                           |
| Basal cell carcinoma                                                                                 | 10 (0.2) [0.1, 0.4]                                                       | 1 (<0.1) [0.0, 0.4]                                                       |
| Bowen's disease                                                                                      | 1 (<0.1) [0.0, 0.1]                                                       | 0 [0.0, 0.3]                                                              |
| Carcinoma <i>in situ</i> of the skin                                                                 | 1 (<0.1) [0.0, 0.3]                                                       | 0 [0.0, 0.1]                                                              |
| Malignant melanoma                                                                                   | 3 (<0.1) [0.0, 0.2]                                                       | 1 (<0.1) [0.0, 0.4]                                                       |
| Neuroendocrine carcinoma of the skin                                                                 | 1 (<0.1) [0.0, 0.1]                                                       | 0 [0.0, 0.3]                                                              |
| Squamous cell carcinoma of the skin                                                                  | 9 (0.2) [0.1, 0.4]                                                        | 1 (<0.1) [0.0, 0.4]                                                       |
| <b>Gastrointestinal tract</b>                                                                        |                                                                           |                                                                           |
| Adenocarcinoma gastric                                                                               | 1 (<0.1) [0.0, 0.1]                                                       | 0 [0.0, 0.3]                                                              |
| Adenocarcinoma of the colon                                                                          | 1 (<0.1) [0.0, 0.1]                                                       | 1 (<0.1) [0.0, 0.4]                                                       |
| Colon cancer                                                                                         | 0 [0.0, 0.1]                                                              | 1 (<0.1) [0.0, 0.4]                                                       |
| Colon cancer metastatic                                                                              | 0 [0.0, 0.1]                                                              | 1 (<0.1) [0.0, 0.4]                                                       |
| Rectal adenocarcinoma                                                                                | 1 (<0.1) [0.0, 0.1]                                                       | 0 [0.0, 0.3]                                                              |
| <b>Lung</b>                                                                                          |                                                                           |                                                                           |
| Large cell lung cancer                                                                               | 0 [0.0, 0.1]                                                              | 1 (<0.1) [0.0, 0.4]                                                       |
| Lung adenocarcinoma                                                                                  | 3 (<0.1) [0.0, 0.2]                                                       | 0 [0.0, 0.3]                                                              |
| Lung carcinoma cell type unspecified stage IV                                                        | 1 (<0.1) [0.0, 0.1]                                                       | 0 [0.0, 0.3]                                                              |
| Lung neoplasm malignant                                                                              | 1 (<0.1) [0.0, 0.1]                                                       | 0 [0.0, 0.3]                                                              |
| Lung squamous cell carcinoma stage IV                                                                | 0 [0.0, 0.1]                                                              | 1 (<0.1) [0.0, 0.4]                                                       |
| <b>Breast</b>                                                                                        |                                                                           |                                                                           |
| Breast cancer                                                                                        | 2 (<0.1) [0.0, 0.2]                                                       | 0 [0.0, 0.3]                                                              |
| Breast cancer metastatic                                                                             | 0 [0.0, 0.1]                                                              | 1 (<0.1) [0.0, 0.4]                                                       |
| Intraductal proliferative breast lesion                                                              | 1 (<0.1) [0.0, 0.1]                                                       | 0 [0.0, 0.3]                                                              |
| Invasive ductal breast carcinoma                                                                     | 1 (<0.1) [0.0, 0.1]                                                       | 0 [0.0, 0.3]                                                              |
| <b>Female reproductive system</b>                                                                    |                                                                           |                                                                           |
| Endometrial adenocarcinoma                                                                           | 1 (<0.1) [0.0, 0.1]                                                       | 0 [0.0, 0.3]                                                              |
| Ovarian endometrioid carcinoma                                                                       | 1 (<0.1) [0.0, 0.1]                                                       | 0 [0.0, 0.3]                                                              |
| Squamous cell carcinoma of the vulva                                                                 | 1 (<0.1) [0.0, 0.1]                                                       | 0 [0.0, 0.3]                                                              |
| Vulval cancer                                                                                        | 1 (<0.1) [0.0, 0.1]                                                       | 0 [0.0, 0.3]                                                              |
| <b>Lymphatic system</b>                                                                              |                                                                           |                                                                           |
| B cell lymphoma                                                                                      | 0 [0.0, 0.1]                                                              | 1 (<0.1) [0.0, 0.4]                                                       |
| Diffuse large B cell lymphoma                                                                        | 0 [0.0, 0.1]                                                              | 1 (<0.1) [0.0, 0.4]                                                       |
| Hodgkin's disease stage IV                                                                           | 0 [0.0, 0.1]                                                              | 1 (<0.1) [0.0, 0.4]                                                       |
| <b>Bone</b>                                                                                          |                                                                           |                                                                           |
| Metastases to bone                                                                                   | 0 [0.0, 0.1]                                                              | 1 (<0.1) [0.0, 0.4]                                                       |
| Metastases to bone marrow                                                                            | 0 [0.0, 0.1]                                                              | 1 (<0.1) [0.0, 0.4]                                                       |
| <b>Oral cavity/larynx</b>                                                                            |                                                                           |                                                                           |
| Squamous cell carcinoma of the oral cavity                                                           | 1 (<0.1) [0.0, 0.1]                                                       | 0 [0.0, 0.3]                                                              |
| Laryngeal cancer                                                                                     | 1 (<0.1) [0.0, 0.1]                                                       | 0 [0.0, 0.3]                                                              |
| <b>Urinary tract</b>                                                                                 |                                                                           |                                                                           |
| Bladder transitional cell carcinoma                                                                  | 1 (<0.1) [0.0, 0.1]                                                       | 0 [0.0, 0.3]                                                              |
| <b>Brain/eye</b>                                                                                     |                                                                           |                                                                           |
| Glioblastoma                                                                                         | 1 (<0.1) [0.0, 0.1]                                                       | 0 [0.0, 0.3]                                                              |
| <b>Other organ systems</b>                                                                           |                                                                           |                                                                           |

| <b>Supplementary Table S4</b> Treatment-emergent: malignancies, adjudicated MACE and adjudicated VTE |                                                                           |                                                                           |
|------------------------------------------------------------------------------------------------------|---------------------------------------------------------------------------|---------------------------------------------------------------------------|
| <b>System organ class MedDRA 25.0 preferred term</b>                                                 | <b>Any UPA 15 mg QD<br/>(n=1417; PY=4496.6)<br/>E (E/100 PY) [95% CI]</b> | <b>Any ADA 40 mg EOW<br/>(n=579; PY=1472.4)<br/>E (E/100 PY) [95% CI]</b> |
| Adenocarcinoma                                                                                       | 1 (<0.1) [0.0, 0.1]                                                       | 0 [0.0, 0.3]                                                              |
| Malignant neoplasm of unknown primary site                                                           | 1 (<0.1) [0.0, 0.1]                                                       | 0 [0.0, 0.3]                                                              |
| Metastatic squamous cell carcinoma                                                                   | 1 (<0.1) [0.0, 0.1]                                                       | 0 [0.0, 0.3]                                                              |
| Myxoid liposarcoma                                                                                   | 1 (<0.1) [0.0, 0.1]                                                       | 0 [0.0, 0.3]                                                              |
| Squamous cell carcinoma                                                                              | 1 (<0.1) [0.0, 0.1]                                                       | 0 [0.0, 0.3]                                                              |
| <b>MACE* and other CV events</b>                                                                     |                                                                           |                                                                           |
| <i>CV death</i>                                                                                      |                                                                           |                                                                           |
| Sudden cardiac death                                                                                 | 4 (<0.1) [0.0, 0.2]                                                       | 0 [0.0, 0.3]                                                              |
| Heart failure                                                                                        | 0 [0.0, 0.1]                                                              | 1 (<0.1) [0.0, 0.4]                                                       |
| PE <sup>†</sup>                                                                                      | 1 (<0.1) [0.0, 0.1]                                                       | 0 [0.0, 0.3]                                                              |
| <i>Non-fatal myocardial infarction</i>                                                               | 4 (<0.1) [0.0, 0.2]                                                       | 0 [0.0, 0.3]                                                              |
| <i>Non-fatal stroke</i>                                                                              | 3 (<0.1) [0.0, 0.2]                                                       | 3 (0.2) [0.0, 0.6]                                                        |
| <i>Undetermined/unknown cause of death</i>                                                           | 6 (0.1) [0.0, 0.3]                                                        | 1 (<0.1) [0.0, 0.4]                                                       |
| <i>Other CV events (non-fatal)</i>                                                                   |                                                                           |                                                                           |
| CV procedures                                                                                        | 1 (<0.1) [0.0, 0.1]                                                       | 2 (0.1) [0.0, 0.5]                                                        |
| Unstable angina requiring hospitalisation                                                            | 1 (<0.1) [0.0, 0.1]                                                       | 0 [0.0, 0.3]                                                              |
| Hospital-based treatment for heart failure                                                           | 3 (<0.1) [0.0, 0.2]                                                       | 0 [0.0, 0.3]                                                              |
| Transient ischaemic attack                                                                           | 4 (<0.1) [0.0, 0.2]                                                       | 2 (0.1) [0.0, 0.5]                                                        |
| <b>VTE<sup>‡</sup></b>                                                                               |                                                                           |                                                                           |
| <i>Fatal</i>                                                                                         |                                                                           |                                                                           |
| PE                                                                                                   | 1 (<0.1) [0.0, 0.1]                                                       | 0 [0.0, 0.3]                                                              |
| <i>Non-fatal</i>                                                                                     |                                                                           |                                                                           |
| DVT                                                                                                  | 7 (0.2) [0.1, 0.3]                                                        | 2 (0.1) [0.0, 0.5]                                                        |
| PE                                                                                                   | 7 (0.2) [0.1, 0.3]                                                        | 4 (0.3) [0.1, 0.7]                                                        |
| DVT and PE (concurrent)                                                                              | 3 (<0.1) [0.0, 0.2]                                                       | 0 [0.0, 0.3]                                                              |

Safety was assessed up to week 264, through the cut-off date of 5 October 2022. Treatment-

emergent adverse events included any adverse event with an onset date on or after the first dose of study drug and up to 30 days after the last dose of placebo or UPA and 70 days for ADA, if patients discontinued prematurely. Data through 264 weeks include all patients receiving UPA or ADA, including rescue groups, with assignment based on drug exposure at the time of the event. \*MACE defined as CV death (includes acute MI, sudden cardiac death, heart failure, CV procedure-related death, death due to CV haemorrhage, fatal stroke, PE and other CV causes), non-fatal MI and non-fatal stroke. <sup>†</sup>Also included under VTE. <sup>‡</sup>VTE included DVT and PE (fatal and non-fatal). A concurrent DVT and PE event will be counted under both the 'DVT' row and the 'PE' row, as well as under the 'DVT and PE (concurrent)' row. ADA, adalimumab; CI, confidence interval; CV, cardiovascular; DVT,

deep vein thrombosis; E, events; EOW, every other week; MACE, major adverse cardiovascular event; MedDRA, Medical Dictionary for Regulatory Activities; PE, pulmonary embolism; PY, patient-years; QD, once daily; UPA, upadacitinib; VTE, venous thromboembolic event.



| <b>Supplementary Table S5</b> History of patients with MACE |                               |                              |                                                                                                                                                                                                                                    |
|-------------------------------------------------------------|-------------------------------|------------------------------|------------------------------------------------------------------------------------------------------------------------------------------------------------------------------------------------------------------------------------|
| <b>Treatment group</b>                                      | <b>Type of MACE*</b>          | <b>Age at start of study</b> | <b>Relevant medical history</b>                                                                                                                                                                                                    |
| Any UPA                                                     | CV death                      | 77                           | Hypertensive since 2001, former smoker for 56 years                                                                                                                                                                                |
| Any UPA                                                     | CV death                      | 73                           | Diabetes mellitus since 2010, hypothyroidism since 2011                                                                                                                                                                            |
| Any UPA                                                     | CV death <sup>§</sup>         | 74                           | Hypertension, obesity (BMI 36.1), trauma, recent immobilisation due to fall, former smoker                                                                                                                                         |
| Any UPA                                                     | CV death                      | 58                           | Hypertension since 2010, diabetes mellitus since 2014, obesity (BMI 41.8)                                                                                                                                                          |
| Any UPA                                                     | CV death                      | 57                           | Cardiopulmonary arrest, hypertension, former smoker                                                                                                                                                                                |
| Any ADA                                                     | CV death                      | 66                           | Pre-existing cardiac condition on ECG (left ventricular hypertrophy), hypertension since 1987, diabetes mellitus since 2014, history of chronic bronchitis, recent event of exacerbation of chronic bronchitis, obesity (BMI 34.0) |
| Any UPA                                                     | Non-fatal MI <sup>†</sup>     | 68                           | Hypertensive since 2014, current smoker for 40 years                                                                                                                                                                               |
| Any UPA                                                     | Non-fatal MI                  | 42                           | Hypertension, dyslipidaemia, and diabetes mellitus since 2011; former cigarette smoker for 10 years, current cigar smoker, obesity (BMI 58.2)                                                                                      |
| Any UPA                                                     | Non-fatal MI <sup>‡</sup>     | 53                           | Pre-existing cardiac condition on ECG (left atrial enlargement), history of diabetes mellitus, obesity (BMI 33.5)                                                                                                                  |
| Any UPA                                                     | Non-fatal MI                  | 51                           | Hyperlipidaemia, former smoker for 20 years                                                                                                                                                                                        |
| Any UPA                                                     | Non-fatal stroke              | 39                           | Patent foramen ovale, hypercholesterolaemia, current smoker for 20 years                                                                                                                                                           |
| Any UPA                                                     | Non-fatal stroke              | 55                           | Obesity since 2007 (BMI 42.8), hypertension since 2009, diabetes mellitus since 2015, current smoker for 36 years                                                                                                                  |
| Any UPA                                                     | Non-fatal stroke              | 70                           | History of paroxysmal atrial fibrillation                                                                                                                                                                                          |
| Any ADA                                                     | Non-fatal stroke              | 57                           | Hypertension since 2009, current smoker for 41 years, thrombolysis therapy for treatment of TEAE of PE                                                                                                                             |
| Any ADA                                                     | Non-fatal stroke <sup>‡</sup> | 71                           | Hypertension since 1998, hypercholesterolaemia since 2016                                                                                                                                                                          |
| Any ADA                                                     | Non-fatal stroke              | 59                           | Hypertension since 2004, hyperlipidaemia and diabetes mellitus since 2009, atrial fibrillation since 2015, obesity (BMI 43.9)                                                                                                      |

Safety was assessed up to week 264, through the cut-off date of 5 October 2022. Treatment-emergent adverse events included any adverse event with an onset date on or after the first dose of study drug and up to 30 days after the last dose of PBO or UPA and 70 days for ADA, if patients discontinued

prematurely. Some patients had more than one event. Data through 264 weeks include all patients receiving UPA or ADA, including rescue groups, with assignment based on drug exposure at the time of the event. Obesity was defined as a BMI  $\geq 30.0$ . \*MACE defined as CV death (includes acute MI, sudden cardiac death, heart failure, CV procedure-related death, death due to CV haemorrhage, fatal stroke, PE and other cardiovascular causes), non-fatal MI and non-fatal stroke. †Patient also had a serious adverse event adjudicated as non-fatal MI during exposure to PBO (study day 70; 114 days prior to treatment switch). ‡Reasonable possibility of being related to study drug per investigator. §Included PE which counted towards both MACE and venous thromboembolic event. ADA, adalimumab; BMI, body mass index; CV, cardiovascular; ECG, electrocardiogram; MACE, major adverse cardiovascular event; MI, myocardial infarction; PBO, placebo; PE, pulmonary embolism; TEAE, treatment-emergent adverse event; UPA, upadacitinib.

**Supplementary Table S6** History of patients with VTE

| Treatment group | Type of VTE*            | Age at start of study | Relevant medical history                                                                                                                             |
|-----------------|-------------------------|-----------------------|------------------------------------------------------------------------------------------------------------------------------------------------------|
| Any UPA         | PE <sup>†</sup>         | 44                    | Hypertension since 2015, oral contraceptive use, recent hospitalisation, obesity (BMI 31.2)                                                          |
| Any UPA         | PE <sup>†</sup>         | 63                    | Obesity since 1990 (BMI of 37.5), hypertension since 2015, former smoker for 35 years, family history of PE (patient's sister)                       |
| Any UPA         | PE                      | 63                    | History of PE, former smoker, congestive heart failure                                                                                               |
| Any ADA         | PE <sup>†</sup>         | 52                    | History of hypertension with hypertonic angiopathy, obesity (BMI 32.0), concomitant glucocorticoids, concurrent event of worsening dyspnoea          |
| Any ADA         | PE                      | 69                    | Hypertension since 2000, history of obesity and Takotsubo cardiomyopathy, obesity (BMI 41.3), former smoker for 31 years                             |
| Any ADA         | PE                      | 57                    | Hypertension since 2009, current smoker for 41 years                                                                                                 |
| Any ADA         | PE                      | 65                    | Obesity since 1974 (BMI 47.3), diabetes mellitus since 2004, hypertension since 2005, former smoker for 15 years, concomitant use of celecoxib       |
| Any ADA         | PE                      | 60                    | Hypertension since 1984, history of obesity and lung fibrosis, obesity (BMI 64.0), former smoker for 22 years                                        |
| Any UPA         | DVT <sup>†</sup>        | 51                    | Dyslipidaemia since 2016, hypertension since 2017, obesity (BMI 35.5), former smoker for 8 years, recent prolonged sitting due to travel for 3 hours |
| Any UPA         | DVT <sup>†</sup>        | 34                    | Hormonal contraceptive use, methylprednisolone use, obesity (BMI 39.7)                                                                               |
| Any UPA         | DVT                     | 47                    | Hypercholesterolaemia, atrial fibrillation                                                                                                           |
| Any ADA         | DVT                     | 67                    | Hypertension since 2012, obstructive sleep apnoea since 2014, history of PE, cardiac murmur, hyperlipidaemia, obesity (BMI 41.8)                     |
| Any ADA         | DVT <sup>†</sup>        | 61                    | Peripheral vascular venous disease since 1992, hypertension since 2008, sedentary lifestyle                                                          |
| Any ADA         | DVT                     | 66                    | Hypertension, congestive heart failure, lower extremity varicose veins, recent leg muscle strain, former smoker                                      |
| Any UPA         | DVT and PE              | 51                    | History of prior DVT, current smoker for 35 years                                                                                                    |
| Any UPA         | DVT and PE <sup>†</sup> | 36                    | Oral contraceptive use, recent lower extremity trauma, obesity (BMI 31.2)                                                                            |
| Any UPA         | CV death <sup>‡</sup>   | 74                    | Hypertension, obesity (BMI 36.1), trauma, recent immobilisation due to fall, former smoker                                                           |

Safety was assessed up to week 264, through the cut-off date of 5 October 2022. Treatment-emergent adverse events included any adverse event with an onset date on or after the first dose of study drug and up to 30 days after the last dose of placebo or UPA and 70 days for ADA, if patients discontinued prematurely. Some patients had more than one event. Data through 264 weeks include all patients receiving UPA or ADA, including rescue groups, with assignment based on drug exposure at the time of the event. Obesity was defined as a BMI  $\geq 30.0$ . \*VTE included DVT and PE (fatal and non-fatal).

<sup>†</sup>Reasonable possibility of being related to study drug per investigator. <sup>‡</sup>Included PE which counted towards both major adverse cardiovascular event and VTE. ADA, adalimumab; BMI, body mass index; CV, cardiovascular; DVT, deep vein thrombosis; PE, pulmonary embolism; UPA, upadacitinib; VTE, venous thromboembolic event.

| <b>Supplementary Table S7 Treatment-emergent: deaths</b>                        |                                                                  |                                                                  |
|---------------------------------------------------------------------------------|------------------------------------------------------------------|------------------------------------------------------------------|
| <b>System organ class MedDRA 25.0 preferred term</b>                            | <b>Any UPA 15 mg QD<br/>(n=1417; PY=4496.6)<br/>E (E/100 PY)</b> | <b>Any ADA 40 mg EOW<br/>(n=579; PY=1472.4)<br/>E (E/100 PY)</b> |
| <b>Deaths</b>                                                                   |                                                                  |                                                                  |
| <i>Cardiac disorders</i>                                                        |                                                                  |                                                                  |
| Acute myocardial infarction                                                     | 2 (<0.1)                                                         | 0                                                                |
| Arteriosclerosis coronary artery                                                | 1 (<0.1)                                                         | 0                                                                |
| Cardiac arrest                                                                  | 1 (<0.1)                                                         | 0                                                                |
| Cardiac failure                                                                 | 3 (<0.1)                                                         | 0                                                                |
| Cardiorespiratory arrest                                                        | 2 (<0.1)                                                         | 0                                                                |
| Cardiopulmonary failure                                                         | 0                                                                | 1 (<0.1)                                                         |
| Hypertensive heart disease                                                      | 1 (<0.1)                                                         | 0                                                                |
| Left ventricular failure                                                        | 0                                                                | 1 (<0.1)                                                         |
| Myocardial infarction                                                           | 2 (<0.1)                                                         | 0                                                                |
| <i>General disorders and administration site conditions</i>                     |                                                                  |                                                                  |
| Death                                                                           | 4 (<0.1)                                                         | 0                                                                |
| Multiple organ dysfunction syndrome                                             | 2 (<0.1)                                                         | 1 (<0.1)                                                         |
| Sudden death                                                                    | 1 (<0.1)                                                         | 1 (<0.1)                                                         |
| <i>Infections and infestations</i>                                              |                                                                  |                                                                  |
| COVID-19                                                                        | 4 (<0.1)                                                         | 0                                                                |
| COVID-19 pneumonia                                                              | 6 (0.1)                                                          | 0                                                                |
| Meningitis listeria                                                             | 1 (<0.1)                                                         | 0                                                                |
| Nosocomial infection                                                            | 1 (<0.1)                                                         | 0                                                                |
| Pneumonia                                                                       | 1 (<0.1)                                                         | 1 (<0.1)                                                         |
| Sepsis                                                                          | 1 (<0.1)                                                         | 0                                                                |
| <i>Injury, poisoning and procedural complications</i>                           |                                                                  |                                                                  |
| Craniocerebral injury                                                           | 0                                                                | 1 (<0.1)                                                         |
| Pelvic fracture                                                                 | 1 (<0.1)                                                         | 0                                                                |
| <i>Musculoskeletal and connective tissue disorders</i>                          |                                                                  |                                                                  |
| Mixed connective tissue disease                                                 | 0                                                                | 1 (<0.1)                                                         |
| <i>Neoplasms benign, malignant and unspecified (including cysts and polyps)</i> |                                                                  |                                                                  |
| Colon cancer metastatic                                                         | 0                                                                | 1 (<0.1)                                                         |
| Diffuse large B cell lymphoma                                                   | 0                                                                | 1 (<0.1)                                                         |
| Lung carcinoma cell type unspecified stage IV                                   | 1 (<0.1)                                                         | 0                                                                |
| Lung squamous cell carcinoma stage IV                                           | 0                                                                | 1 (<0.1)                                                         |
| Malignant neoplasm of unknown primary site                                      | 1 (<0.1)                                                         | 0                                                                |
| <i>Respiratory, thoracic and mediastinal disorders</i>                          |                                                                  |                                                                  |
| Acute respiratory distress syndrome                                             | 1 (<0.1)                                                         | 0                                                                |
| Respiratory failure*                                                            | 1 (<0.1)                                                         | 0                                                                |

Safety was assessed up to week 264, through the cut-off date of 5 October 2022. Treatment-

emergent adverse events included any adverse event with an onset date on or after the first dose of study drug and up to 30 days after the last dose of placebo or UPA and 70 days for ADA, if patients

discontinued prematurely. Data through 264 weeks include all patients receiving UPA or ADA, including rescue groups, with assignment based on drug exposure at the time of the event.

\*Respiratory failure related to COVID-19. ADA, adalimumab; E, events; EOW, every other week; MedDRA, Medical Dictionary for Regulatory Activities; PY, patient-years; QD, once daily; UPA, upadacitinib.

**Supplementary Table S8** Proportions of patients achieving CDAI LDA ( $\leq 10$ )/remission ( $\leq 2.8$ ), DAS28(CRP)  $\leq 3.2$ / $< 2.6$ , ACR20, ACR50 and ACR70 through 264 weeks (NRI)

| n/N (%)               | Weeks          |                |                |                |                |                |                |                |                |                |                |
|-----------------------|----------------|----------------|----------------|----------------|----------------|----------------|----------------|----------------|----------------|----------------|----------------|
|                       | 12             | 26             | 48             | 60             | 72             | 84             | 96             | 108            | 120            | 132            | 144            |
| CDAI $\leq 10$        |                |                |                |                |                |                |                |                |                |                |                |
| UPA                   | 263/651 (40.4) | 343/651 (52.7) | 299/651 (45.9) | 299/651 (45.9) | 294/651 (45.2) | 290/651 (44.5) | 285/651 (43.8) | 276/651 (42.4) | 277/651 (42.5) | 271/651 (41.6) | 265/651 (40.7) |
| ADA                   | 98/327 (30.0)  | 125/327 (38.2) | 107/327 (32.7) | 107/327 (32.7) | 104/327 (31.8) | 99/327 (30.3)  | 98/327 (30.0)  | 100/327 (30.6) | 99/327 (30.3)  | 102/327 (31.2) | 96/327 (29.4)  |
| CDAI $\leq 2.8$       |                |                |                |                |                |                |                |                |                |                |                |
| UPA                   | 87/651 (13.4)  | 150/651 (23.0) | 166/651 (25.5) | 160/651 (24.6) | 183/651 (28.1) | 176/651 (27.0) | 177/651 (27.2) | 163/651 (25.0) | 169/651 (26.0) | 170/651 (26.1) | 159/651 (24.4) |
| ADA                   | 25/327 (7.6)   | 45/327 (13.8)  | 55/327 (16.8)  | 49/327 (15.0)  | 54/327 (16.5)  | 56/327 (17.1)  | 53/327 (16.2)  | 53/327 (16.2)  | 51/327 (15.6)  | 55/327 (16.8)  | 60/327 (18.3)  |
| DAS28(CRP) $\leq 3.2$ |                |                |                |                |                |                |                |                |                |                |                |
| UPA                   | 293/651 (45.0) | 356/651 (54.7) | 297/651 (45.6) | 286/651 (43.9) | 293/651 (45.0) | 283/651 (43.5) | 282/651 (43.3) | 284/651 (43.6) | 275/651 (42.2) | 269/651 (41.3) | 253/651 (38.9) |
| ADA                   | 94/327 (28.7)  | 126/327 (38.5) | 105/327 (32.1) | 99/327 (30.3)  | 96/327 (29.4)  | 93/327 (28.4)  | 93/327 (28.4)  | 104/327 (31.8) | 95/327 (29.1)  | 95/327 (29.1)  | 90/327 (27.5)  |
| DAS28(CRP) $< 2.6$    |                |                |                |                |                |                |                |                |                |                |                |
| UPA                   | 187/651 (28.7) | 266/651 (40.9) | 243/651 (37.3) | 247/651 (37.9) | 259/651 (39.8) | 256/651 (39.3) | 242/651 (37.2) | 238/651 (36.6) | 242/651 (37.2) | 236/651 (36.3) | 215/651 (33.0) |
| ADA                   | 59/327 (18.0)  | 88/327 (26.9)  | 87/327 (26.6)  | 79/327 (24.2)  | 83/327 (25.4)  | 83/327 (25.4)  | 78/327 (23.9)  | 84/327 (25.7)  | 79/327 (24.2)  | 79/327 (24.2)  | 76/327 (23.2)  |
| ACR20                 |                |                |                |                |                |                |                |                |                |                |                |
| UPA                   | 450/651 (69.1) | 436/651 (67.0) | 328/651 (50.4) | 316/651 (48.5) | 305/651 (46.9) | 308/651 (47.3) | 306/651 (47.0) | 302/651 (46.4) | 298/651 (45.8) | 288/651 (44.2) | 271/651 (41.6) |
| ADA                   | 206/327 (63.0) | 187/327 (57.2) | 116/327 (35.5) | 117/327 (35.8) | 110/327 (33.6) | 107/327 (32.7) | 109/327 (33.3) | 108/327 (33.0) | 106/327 (32.4) | 107/327 (32.7) | 103/327 (31.5) |
| ACR50                 |                |                |                |                |                |                |                |                |                |                |                |
| UPA                   | 288/651 (44.2) | 349/651 (53.6) | 284/651 (43.6) | 279/651 (42.9) | 279/651 (42.9) | 282/651 (43.3) | 277/651 (42.5) | 262/651 (40.2) | 270/651 (41.5) | 253/651 (38.9) | 240/651 (36.9) |
| ADA                   | 93/327 (28.4)  | 137/327 (41.9) | 101/327 (30.9) | 101/327 (30.9) | 93/327 (28.4)  | 96/327 (29.4)  | 95/327 (29.1)  | 94/327 (28.7)  | 88/327 (26.9)  | 94/327 (28.7)  | 91/327 (27.8)  |
| ACR70                 |                |                |                |                |                |                |                |                |                |                |                |
| UPA                   | 162/651 (24.9) | 224/651 (34.4) | 225/651 (34.6) | 226/651 (34.7) | 227/651 (34.9) | 223/651 (34.3) | 223/651 (34.3) | 219/651 (33.6) | 217/651 (33.3) | 209/651 (32.1) | 208/651 (32.0) |
| ADA                   | 43/327 (13.1)  | 75/327 (22.9)  | 74/327 (22.6)  | 69/327 (21.1)  | 75/327 (22.9)  | 75/327 (22.9)  | 68/327 (20.8)  | 74/327 (22.6)  | 68/327 (20.8)  | 73/327 (22.3)  | 71/327 (21.7)  |
| n/N (%)               | Weeks          |                |                |                |                |                |                |                |                |                |                |
|                       | 156            | 168            | 180            | 192            | 204            | 216            | 228            | 240            | 252            | 264            |                |
| CDAI $\leq 10$        |                |                |                |                |                |                |                |                |                |                |                |
| UPA                   | 257/651 (39.5) | 262/651 (40.2) | 260/651 (39.9) | 252/651 (38.7) | 241/651 (37.0) | 252/651 (38.7) | 243/651 (37.3) | 245/651 (37.6) | 238/651 (36.6) | 237/651 (36.4) |                |
| ADA                   | 96/327 (29.4)  | 94/327 (28.7)  | 94/327 (28.7)  | 93/327 (28.4)  | 89/327 (27.2)  | 89/327 (27.2)  | 91/327 (27.8)  | 92/327 (28.1)  | 87/327 (26.6)  | 88/327 (26.9)  |                |
| CDAI $\leq 2.8$       |                |                |                |                |                |                |                |                |                |                |                |
| UPA                   | 159/651 (24.4) | 164/651 (25.2) | 165/651 (25.3) | 171/651 (26.3) | 166/651 (25.5) | 165/651 (25.3) | 168/651 (25.8) | 157/651 (24.1) | 160/651 (24.6) | 160/651 (24.6) |                |
| ADA                   | 54/327 (16.5)  | 59/327 (18.0)  | 57/327 (17.4)  | 56/327 (17.1)  | 55/327 (16.8)  | 58/327 (17.7)  | 61/327 (18.7)  | 65/327 (19.9)  | 59/327 (18.0)  | 61/327 (18.7)  |                |
| DAS28(CRP) $\leq 3.2$ |                |                |                |                |                |                |                |                |                |                |                |
| UPA                   | 245/651 (37.6) | 252/651 (38.7) | 238/651 (36.6) | 240/651 (36.9) | 227/651 (34.9) | 231/651 (35.5) | 236/651 (36.3) | 229/651 (35.2) | 225/651 (34.6) | 226/651 (34.7) |                |
| ADA                   | 85/327 (26.0)  | 78/327 (23.9)  | 78/327 (23.9)  | 83/327 (25.4)  | 78/327 (23.9)  | 75/327 (22.9)  | 79/327 (24.2)  | 83/327 (25.4)  | 76/327 (23.2)  | 81/327 (24.8)  |                |
| DAS28(CRP) $< 2.6$    |                |                |                |                |                |                |                |                |                |                |                |
| UPA                   | 215/651 (33.0) | 223/651 (34.3) | 215/651 (33.0) | 210/651 (32.3) | 208/651 (32.0) | 212/651 (32.6) | 210/651 (32.3) | 198/651 (30.4) | 199/651 (30.6) | 207/651 (31.8) |                |
| ADA                   | 71/327 (21.7)  | 73/327 (22.3)  | 63/327 (19.3)  | 69/327 (21.1)  | 64/327 (19.6)  | 64/327 (19.6)  | 67/327 (20.5)  | 75/327 (22.9)  | 67/327 (20.5)  | 76/327 (23.2)  |                |
| ACR20                 |                |                |                |                |                |                |                |                |                |                |                |
| UPA                   | 271/651 (41.6) | 274/651 (42.1) | 272/651 (41.8) | 269/651 (41.3) | 263/651 (40.4) | 260/651 (39.9) | 261/651 (40.1) | 260/651 (39.9) | 252/651 (38.7) | 250/651 (38.4) |                |
| ADA                   | 98/327 (30.0)  | 100/327 (30.6) | 99/327 (30.3)  | 99/327 (30.3)  | 94/327 (28.7)  | 95/327 (29.1)  | 96/327 (29.4)  | 94/327 (28.7)  | 92/327 (28.1)  | 93/327 (28.4)  |                |

|       |                |                |                |                |                |                |                |                |                |                |
|-------|----------------|----------------|----------------|----------------|----------------|----------------|----------------|----------------|----------------|----------------|
| ACR50 |                |                |                |                |                |                |                |                |                |                |
| UPA   | 249/651 (38.2) | 253/651 (38.9) | 253/651 (38.9) | 252/651 (38.7) | 241/651 (37.0) | 241/651 (37.0) | 235/651 (36.1) | 233/651 (35.8) | 234/651 (35.9) | 230/651 (35.3) |
| ADA   | 87/327 (26.6)  | 84/327 (25.7)  | 90/327 (27.5)  | 88/327 (26.9)  | 84/327 (25.7)  | 84/327 (25.7)  | 89/327 (27.2)  | 87/327 (26.6)  | 85/327 (26.0)  | 84/327 (25.7)  |
| ACR70 |                |                |                |                |                |                |                |                |                |                |
| UPA   | 211/651 (32.4) | 205/651 (31.5) | 212/651 (32.6) | 210/651 (32.3) | 199/651 (30.6) | 201/651 (30.9) | 197/651 (30.3) | 200/651 (30.7) | 193/651 (29.6) | 186/651 (28.6) |
| ADA   | 67/327 (20.5)  | 70/327 (21.4)  | 71/327 (21.7)  | 72/327 (22.0)  | 69/327 (21.1)  | 65/327 (19.9)  | 75/327 (22.9)  | 73/327 (22.3)  | 68/327 (20.8)  | 73/327 (22.3)  |

Categorical data points of categorical endpoints analysed by randomised treatment group (NRI) shown in Figure 1 (CDAI and DAS28[CRP] responses) and Figure 3 (ACR20/50/70 responses). ACR20/50/70,  $\geq 20/50/70\%$  improvement in American College of Rheumatology response criteria; ADA, adalimumab; CDAI, Clinical Disease Activity Index; DAS28(CRP), 28-joint Disease Activity Score based on C-reactive protein; LDA, low disease activity; NRI, non-responder imputation; UPA, upadacitinib.



| <b>Supplementary Table S9</b> Proportions of patients achieving CDAI LDA ( $\leq 10$ )/remission ( $\leq 2.8$ ), DAS28(CRP) $\leq 3.2$ / $< 2.6$ , ACR20, ACR50, ACR70 and no radiographic progression through 264 weeks (AO) |                |                |                |                |                |                |                |                |                |                |                |
|-------------------------------------------------------------------------------------------------------------------------------------------------------------------------------------------------------------------------------|----------------|----------------|----------------|----------------|----------------|----------------|----------------|----------------|----------------|----------------|----------------|
| n/N (%)                                                                                                                                                                                                                       | Weeks          |                |                |                |                |                |                |                |                |                |                |
|                                                                                                                                                                                                                               | 12             | 26             | 48             | 60             | 72             | 84             | 96             | 108            | 120            | 132            | 144            |
| <b>CDAI <math>\leq 10</math></b>                                                                                                                                                                                              |                |                |                |                |                |                |                |                |                |                |                |
| UPA continued                                                                                                                                                                                                                 | 232/367 (63.2) | 334/359 (93.0) | 301/343 (87.8) | 303/338 (89.6) | 297/328 (90.5) | 294/326 (90.2) | 288/322 (89.4) | 279/310 (90.0) | 282/309 (91.3) | 276/308 (89.6) | 271/290 (93.4) |
| ADA continued                                                                                                                                                                                                                 | 77/147 (52.4)  | 122/137 (89.1) | 111/131 (84.7) | 111/130 (85.4) | 108/125 (86.4) | 102/127 (80.3) | 100/123 (81.3) | 105/120 (87.5) | 103/116 (88.8) | 104/114 (91.2) | 100/114 (87.7) |
| PBO to UPA                                                                                                                                                                                                                    | 108/613 (17.6) | 264/600 (44.0) | 383/571 (67.1) | 387/553 (70.0) | 401/539 (74.4) | 400/532 (75.2) | 394/515 (76.5) | 399/506 (78.9) | 411/495 (83.0) | 396/488 (81.1) | 372/456 (81.6) |
| ADA to UPA                                                                                                                                                                                                                    | 22/157 (14.0)  | 31/154 (20.1)  | 82/143 (57.3)  | 82/139 (59.0)  | 84/132 (63.6)  | 82/129 (63.6)  | 81/127 (63.8)  | 81/124 (65.3)  | 88/125 (70.4)  | 95/125 (76.0)  | 85/115 (73.9)  |
| UPA to ADA                                                                                                                                                                                                                    | 34/246 (13.8)  | 36/248 (14.5)  | 102/229 (44.5) | 115/217 (53.0) | 107/204 (52.5) | 123/200 (61.5) | 110/190 (57.9) | 113/183 (61.7) | 108/176 (61.4) | 113/180 (62.8) | 112/176 (63.6) |
| <b>CDAI <math>\leq 2.8</math></b>                                                                                                                                                                                             |                |                |                |                |                |                |                |                |                |                |                |
| UPA continued                                                                                                                                                                                                                 | 87/367 (23.7)  | 150/359 (41.8) | 167/343 (48.7) | 161/338 (47.6) | 184/328 (56.1) | 177/326 (54.3) | 177/322 (55.0) | 164/310 (52.9) | 170/309 (55.0) | 172/308 (55.8) | 160/290 (55.2) |
| ADA continued                                                                                                                                                                                                                 | 24/147 (16.3)  | 45/137 (32.8)  | 55/131 (42.0)  | 51/130 (39.2)  | 55/125 (44.0)  | 56/127 (44.1)  | 53/123 (43.1)  | 54/120 (45.0)  | 54/116 (46.6)  | 56/114 (49.1)  | 62/114 (54.4)  |
| PBO to UPA                                                                                                                                                                                                                    | 20/613 (3.3)   | 71/600 (11.8)  | 160/571 (28.0) | 170/553 (30.7) | 191/539 (35.4) | 197/532 (37.0) | 203/515 (39.4) | 191/506 (37.7) | 203/495 (41.0) | 208/488 (42.6) | 191/456 (41.9) |
| ADA to UPA                                                                                                                                                                                                                    | 1/157 (0.6)    | 6/154 (3.9)    | 26/143 (18.2)  | 33/139 (23.7)  | 27/132 (20.5)  | 28/129 (21.7)  | 25/127 (19.7)  | 35/124 (28.2)  | 38/125 (30.4)  | 32/125 (25.6)  | 35/115 (30.4)  |
| UPA to ADA                                                                                                                                                                                                                    | 0/246 (0)      | 4/248 (1.6)    | 13/229 (5.7)   | 22/217 (10.1)  | 26/204 (12.7)  | 32/200 (16.0)  | 32/190 (16.8)  | 31/183 (16.9)  | 30/176 (17.0)  | 31/180 (17.2)  | 34/176 (19.3)  |
| <b>DAS28(CRP) <math>\leq 3.2</math></b>                                                                                                                                                                                       |                |                |                |                |                |                |                |                |                |                |                |
| UPA continued                                                                                                                                                                                                                 | 251/355 (70.7) | 328/360 (91.1) | 299/346 (86.4) | 288/334 (86.2) | 296/329 (90.0) | 286/324 (88.3) | 285/320 (89.1) | 288/314 (91.7) | 281/312 (90.1) | 274/308 (89.0) | 258/281 (91.8) |
| ADA continued                                                                                                                                                                                                                 | 75/144 (52.1)  | 117/136 (86.0) | 108/134 (80.6) | 103/130 (79.2) | 99/128 (77.3)  | 96/127 (75.6)  | 95/122 (77.9)  | 108/123 (87.8) | 99/120 (82.5)  | 96/115 (83.5)  | 93/112 (83.0)  |
| PBO to UPA                                                                                                                                                                                                                    | 92/594 (15.5)  | 250/604 (41.4) | 402/577 (69.7) | 402/561 (71.7) | 409/548 (74.6) | 408/527 (77.4) | 392/509 (77.0) | 394/500 (78.8) | 399/497 (80.3) | 383/473 (81.0) | 354/431 (82.1) |
| ADA to UPA                                                                                                                                                                                                                    | 19/153 (12.4)  | 45/157 (28.7)  | 85/145 (58.6)  | 81/139 (58.3)  | 85/134 (63.4)  | 85/131 (64.9)  | 84/128 (65.6)  | 77/120 (64.2)  | 89/124 (71.8)  | 87/116 (75.0)  | 77/107 (72.0)  |
| UPA to ADA                                                                                                                                                                                                                    | 44/233 (18.9)  | 53/248 (21.4)  | 93/235 (39.6)  | 100/217 (46.1) | 98/204 (48.0)  | 116/199 (58.3) | 103/188 (54.8) | 107/182 (58.8) | 111/180 (61.7) | 108/177 (61.0) | 108/163 (66.3) |
| <b>DAS28(CRP) <math>&lt; 2.6</math></b>                                                                                                                                                                                       |                |                |                |                |                |                |                |                |                |                |                |
| UPA continued                                                                                                                                                                                                                 | 169/355 (47.6) | 260/360 (72.2) | 245/346 (70.8) | 249/334 (74.6) | 262/329 (79.6) | 257/324 (79.3) | 243/320 (75.9) | 240/314 (76.4) | 246/312 (78.8) | 239/308 (77.6) | 219/281 (77.9) |
| ADA continued                                                                                                                                                                                                                 | 49/144 (34.0)  | 85/136 (62.5)  | 90/134 (67.2)  | 81/130 (62.3)  | 86/128 (67.2)  | 86/127 (67.7)  | 78/122 (63.9)  | 87/123 (70.7)  | 82/120 (68.3)  | 80/115 (69.6)  | 78/112 (69.6)  |
| PBO to UPA                                                                                                                                                                                                                    | 40/594 (6.7)   | 145/604 (24.0) | 305/577 (52.9) | 319/561 (56.9) | 336/548 (61.3) | 317/527 (60.2) | 313/509 (61.5) | 319/500 (63.8) | 322/497 (64.8) | 299/473 (63.2) | 286/431 (66.4) |
| ADA to UPA                                                                                                                                                                                                                    | 10/153 (6.5)   | 23/157 (14.6)  | 53/145 (36.6)  | 55/139 (39.6)  | 55/134 (41.0)  | 57/131 (43.5)  | 56/128 (43.8)  | 57/120 (47.5)  | 66/124 (53.2)  | 63/116 (54.3)  | 58/107 (54.2)  |
| UPA to ADA                                                                                                                                                                                                                    | 19/233 (8.2)   | 20/248 (8.1)   | 48/235 (20.4)  | 57/217 (26.3)  | 66/204 (32.4)  | 73/199 (36.7)  | 72/188 (38.3)  | 69/182 (37.9)  | 72/180 (40.0)  | 71/177 (40.1)  | 79/163 (48.5)  |
| <b>ACR20</b>                                                                                                                                                                                                                  |                |                |                |                |                |                |                |                |                |                |                |
| UPA continued                                                                                                                                                                                                                 | 321/364 (88.2) | 343/357 (96.1) | 330/344 (95.9) | 319/337 (94.7) | 308/327 (94.2) | 312/325 (96.0) | 308/323 (95.4) | 304/314 (96.8) | 303/314 (96.5) | 292/309 (94.5) | 277/292 (94.9) |
| ADA continued                                                                                                                                                                                                                 | 128/155 (82.6) | 131/136 (96.3) | 119/133 (89.5) | 122/130 (93.8) | 114/129 (88.4) | 112/128 (87.5) | 113/123 (91.9) | 113/122 (92.6) | 110/119 (92.4) | 109/118 (92.4) | 106/116 (91.4) |
| PBO to UPA                                                                                                                                                                                                                    | 236/616 (38.3) | 447/598 (74.7) | 502/577 (87.0) | 481/564 (85.3) | 481/548 (87.8) | 473/537 (88.1) | 471/518 (90.9) | 459/512 (89.6) | 464/501 (92.6) | 447/484 (92.4) | 418/459 (91.1) |
| ADA to UPA                                                                                                                                                                                                                    | 81/155 (52.3)  | 111/155 (71.6) | 117/143 (81.8) | 119/136 (87.5) | 121/134 (90.3) | 112/129 (86.8) | 121/129 (93.8) | 114/127 (89.8) | 110/124 (88.7) | 107/120 (89.2) | 103/114 (90.4) |
| UPA to ADA                                                                                                                                                                                                                    | 131/243 (53.9) | 152/242 (62.8) | 169/229 (73.8) | 173/218 (79.4) | 161/202 (79.7) | 162/200 (81.0) | 158/191 (82.7) | 143/185 (77.3) | 149/182 (81.9) | 147/180 (81.7) | 148/174 (85.1) |
| <b>ACR50</b>                                                                                                                                                                                                                  |                |                |                |                |                |                |                |                |                |                |                |
| UPA continued                                                                                                                                                                                                                 | 241/367 (65.7) | 311/356 (87.4) | 285/342 (83.3) | 281/332 (84.6) | 281/329 (85.4) | 285/325 (87.7) | 277/321 (86.3) | 264/312 (84.6) | 275/314 (87.6) | 256/305 (83.9) | 242/292 (82.9) |
| ADA continued                                                                                                                                                                                                                 | 75/152 (49.3)  | 109/136 (80.1) | 103/132 (78.0) | 103/132 (78.0) | 96/129 (74.4)  | 99/128 (77.3)  | 97/125 (77.6)  | 97/123 (78.9)  | 92/120 (76.7)  | 96/118 (81.4)  | 93/115 (80.9)  |
| PBO to UPA                                                                                                                                                                                                                    | 97/619 (15.7)  | 272/601 (45.3) | 373/576 (64.8) | 374/563 (66.4) | 387/546 (70.9) | 381/529 (72.0) | 374/518 (72.2) | 378/507 (74.6) | 372/495 (75.2) | 361/481 (75.1) | 346/456 (75.9) |
| ADA to UPA                                                                                                                                                                                                                    | 19/157 (12.1)  | 60/154 (39.0)  | 83/141 (58.9)  | 87/137 (63.5)  | 94/134 (70.1)  | 85/130 (65.4)  | 87/128 (68.0)  | 81/125 (64.8)  | 91/123 (74.0)  | 80/119 (67.2)  | 79/112 (70.5)  |
| UPA to ADA                                                                                                                                                                                                                    | 49/246 (19.9)  | 66/243 (27.2)  | 96/232 (41.4)  | 111/216 (51.4) | 97/202 (48.0)  | 107/200 (53.5) | 98/189 (51.9)  | 107/179 (59.8) | 105/180 (58.3) | 99/178 (55.6)  | 105/171 (61.4) |
| <b>ACR70</b>                                                                                                                                                                                                                  |                |                |                |                |                |                |                |                |                |                |                |
| UPA continued                                                                                                                                                                                                                 | 152/371 (41.0) | 215/354 (60.7) | 226/342 (66.1) | 227/336 (67.6) | 228/328 (69.5) | 224/324 (69.1) | 223/324 (68.8) | 221/312 (70.8) | 218/314 (69.4) | 211/306 (69.0) | 210/290 (72.4) |

|                                         |                |                |                |                |                |                |                |                |                |                |                |
|-----------------------------------------|----------------|----------------|----------------|----------------|----------------|----------------|----------------|----------------|----------------|----------------|----------------|
| ADA continued                           | 38/151 (25.2)  | 73/135 (54.1)  | 75/131 (57.3)  | 71/131 (54.2)  | 77/129 (59.7)  | 75/124 (60.5)  | 70/123 (56.9)  | 75/122 (61.5)  | 72/120 (60.0)  | 74/117 (63.2)  | 73/115 (63.5)  |
| PBO to UPA                              | 32/624 (5.1)   | 121/604 (20.0) | 246/576 (42.7) | 256/561 (45.6) | 284/547 (51.9) | 273/537 (50.8) | 293/517 (56.7) | 271/504 (53.8) | 278/495 (56.2) | 276/483 (57.1) | 259/453 (57.2) |
| ADA to UPA                              | 5/158 (3.2)    | 15/154 (9.7)   | 52/142 (36.6)  | 50/139 (36.0)  | 56/134 (41.8)  | 58/129 (45.0)  | 56/126 (44.4)  | 50/123 (40.7)  | 60/124 (48.4)  | 56/119 (47.1)  | 54/111 (48.6)  |
| UPA to ADA                              | 11/250 (4.4)   | 16/245 (6.5)   | 43/233 (18.5)  | 63/220 (28.6)  | 53/204 (26.0)  | 60/199 (30.2)  | 65/191 (34.0)  | 60/182 (33.0)  | 65/181 (35.9)  | 58/180 (32.2)  | 60/173 (34.7)  |
| $\Delta$ mTSS $\leq 0$                  |                |                |                |                |                |                |                |                |                |                |                |
| UPA continued                           | —              | 254/282 (90.1) | —              | —              | —              | —              | —              | 243/292 (83.2) | —              | —              | —              |
| ADA continued                           | —              | 99/112 (88.4)  | —              | —              | —              | —              | —              | 93/114 (81.6)  | —              | —              | —              |
| PBO to UPA                              | —              | 367/435 (84.4) | —              | —              | —              | —              | —              | 358/446 (80.3) | —              | —              | —              |
| ADA to UPA                              | —              | 97/112 (86.6)  | —              | —              | —              | —              | —              | 94/113 (83.2)  | —              | —              | —              |
| UPA to ADA                              | —              | 126/150 (84.0) | —              | —              | —              | —              | —              | 115/152 (75.7) | —              | —              | —              |
| <b>Weeks</b>                            |                |                |                |                |                |                |                |                |                |                |                |
| <b>n/N (%)</b>                          | <b>156</b>     | <b>168</b>     | <b>180</b>     | <b>192</b>     | <b>204</b>     | <b>216</b>     | <b>228</b>     | <b>240</b>     | <b>252</b>     | <b>264</b>     |                |
| <b>CDAI <math>\leq 10</math></b>        |                |                |                |                |                |                |                |                |                |                |                |
| UPA continued                           | 260/281 (92.5) | 266/287 (92.7) | 263/287 (91.6) | 256/283 (90.5) | 246/278 (88.5) | 258/277 (93.1) | 248/275 (90.2) | 250/266 (94.0) | 241/263 (91.6) | 244/260 (93.8) |                |
| ADA continued                           | 100/109 (91.7) | 99/110 (90.0)  | 99/110 (90.0)  | 98/109 (89.9)  | 97/108 (89.8)  | 91/105 (86.7)  | 94/103 (91.3)  | 97/104 (93.3)  | 89/95 (93.7)   | 92/98 (93.9)   |                |
| PBO to UPA                              | 357/440 (81.1) | 367/444 (82.7) | 364/434 (83.9) | 359/436 (82.3) | 359/438 (82.0) | 360/430 (83.7) | 357/431 (82.8) | 358/422 (84.8) | 338/414 (81.6) | 331/415 (79.8) |                |
| ADA to UPA                              | 84/114 (73.7)  | 87/111 (78.4)  | 78/109 (71.6)  | 82/110 (74.5)  | 83/110 (75.5)  | 86/108 (79.6)  | 79/106 (74.5)  | 79/101 (78.2)  | 78/102 (76.5)  | 82/100 (82.0)  |                |
| UPA to ADA                              | 101/157 (64.3) | 101/159 (63.5) | 103/151 (68.2) | 100/153 (65.4) | 102/147 (69.4) | 98/141 (69.5)  | 101/144 (70.1) | 96/142 (67.6)  | 100/136 (73.5) | 103/137 (75.2) |                |
| <b>CDAI <math>\leq 2.8</math></b>       |                |                |                |                |                |                |                |                |                |                |                |
| UPA continued                           | 159/281 (56.6) | 164/287 (57.1) | 166/287 (57.8) | 171/283 (60.4) | 167/278 (60.1) | 167/277 (60.3) | 171/275 (62.2) | 158/266 (59.4) | 160/263 (60.8) | 162/260 (62.3) |                |
| ADA continued                           | 57/109 (52.3)  | 62/110 (56.4)  | 59/110 (53.6)  | 58/109 (53.2)  | 59/108 (54.6)  | 60/105 (57.1)  | 62/103 (60.2)  | 68/104 (65.4)  | 61/95 (64.2)   | 64/98 (65.3)   |                |
| PBO to UPA                              | 203/440 (46.1) | 199/444 (44.8) | 186/434 (42.9) | 185/436 (42.4) | 197/438 (45.0) | 188/430 (43.7) | 185/431 (42.9) | 194/422 (46.0) | 166/414 (40.1) | 181/415 (43.6) |                |
| ADA to UPA                              | 34/114 (29.8)  | 37/111 (33.3)  | 35/109 (32.1)  | 34/110 (30.9)  | 32/110 (29.1)  | 33/108 (30.6)  | 34/106 (32.1)  | 38/101 (37.6)  | 31/102 (30.4)  | 32/100 (32.0)  |                |
| UPA to ADA                              | 36/157 (22.9)  | 33/159 (20.8)  | 37/151 (24.5)  | 39/153 (25.5)  | 30/147 (20.4)  | 36/141 (25.5)  | 34/144 (23.6)  | 38/142 (26.8)  | 38/136 (27.9)  | 36/137 (26.3)  |                |
| <b>DAS28(CRP) <math>\leq 3.2</math></b> |                |                |                |                |                |                |                |                |                |                |                |
| UPA continued                           | 247/265 (93.2) | 255/269 (94.8) | 241/260 (92.7) | 244/264 (92.4) | 232/259 (89.6) | 238/258 (92.2) | 242/268 (90.3) | 232/252 (92.1) | 229/253 (90.5) | 233/249 (93.6) |                |
| ADA continued                           | 89/100 (89.0)  | 82/96 (85.4)   | 82/95 (86.3)   | 89/103 (86.4)  | 85/98 (86.7)   | 77/94 (81.9)   | 82/92 (89.1)   | 88/97 (90.7)   | 79/89 (88.8)   | 85/95 (89.5)   |                |
| PBO to UPA                              | 331/405 (81.7) | 323/401 (80.5) | 320/399 (80.2) | 340/413 (82.3) | 328/408 (80.4) | 326/394 (82.7) | 335/412 (81.3) | 338/402 (84.1) | 310/384 (80.7) | 307/388 (79.1) |                |
| ADA to UPA                              | 78/106 (73.6)  | 79/99 (79.8)   | 68/95 (71.6)   | 79/105 (75.2)  | 73/101 (72.3)  | 79/100 (79.0)  | 76/102 (74.5)  | 70/96 (72.9)   | 73/94 (77.7)   | 81/93 (87.1)   |                |
| UPA to ADA                              | 92/152 (60.5)  | 90/148 (60.8)  | 95/145 (65.5)  | 96/145 (66.2)  | 89/135 (65.9)  | 92/134 (68.7)  | 99/139 (71.2)  | 94/138 (68.1)  | 91/130 (70.0)  | 96/131 (73.3)  |                |
| <b>DAS28(CRP) <math>&lt; 2.6</math></b> |                |                |                |                |                |                |                |                |                |                |                |
| UPA continued                           | 216/265 (81.5) | 224/269 (83.3) | 217/260 (83.5) | 213/264 (80.7) | 213/259 (82.2) | 216/258 (83.7) | 214/268 (79.9) | 200/252 (79.4) | 202/253 (79.8) | 211/249 (84.7) |                |
| ADA continued                           | 73/100 (73.0)  | 76/96 (79.2)   | 66/95 (69.5)   | 73/103 (70.9)  | 68/98 (69.4)   | 66/94 (70.2)   | 68/92 (73.9)   | 79/97 (81.4)   | 69/89 (77.5)   | 80/95 (84.2)   |                |
| PBO to UPA                              | 267/405 (65.9) | 259/401 (64.6) | 263/399 (65.9) | 276/413 (66.8) | 271/408 (66.4) | 271/394 (68.8) | 280/412 (68.0) | 282/402 (70.1) | 255/384 (66.4) | 261/388 (67.3) |                |
| ADA to UPA                              | 60/106 (56.6)  | 58/99 (58.6)   | 57/95 (60.0)   | 55/105 (52.4)  | 56/101 (55.4)  | 56/100 (56.0)  | 61/102 (59.8)  | 57/96 (59.4)   | 52/94 (55.3)   | 53/93 (57.0)   |                |
| UPA to ADA                              | 68/152 (44.7)  | 62/148 (41.9)  | 71/145 (49.0)  | 74/145 (51.0)  | 65/135 (48.1)  | 64/134 (47.8)  | 66/139 (47.5)  | 66/138 (47.8)  | 64/130 (49.2)  | 68/131 (51.9)  |                |
| <b>ACR20</b>                            |                |                |                |                |                |                |                |                |                |                |                |
| UPA continued                           | 272/283 (96.1) | 278/287 (96.9) | 276/285 (96.8) | 272/283 (96.1) | 270/278 (97.1) | 266/276 (96.4) | 266/279 (95.3) | 264/271 (97.4) | 254/266 (95.5) | 256/264 (97.0) |                |
| ADA continued                           | 102/109 (93.6) | 105/111 (94.6) | 105/110 (95.5) | 107/113 (94.7) | 102/109 (93.6) | 100/104 (96.2) | 100/104 (96.2) | 102/105 (97.1) | 94/98 (95.9)   | 97/101 (96.0)  |                |
| PBO to UPA                              | 404/442 (91.4) | 394/445 (88.5) | 401/438 (91.6) | 403/445 (90.6) | 399/440 (90.7) | 392/429 (91.4) | 394/435 (90.6) | 389/426 (91.3) | 377/418 (90.2) | 374/414 (90.3) |                |
| ADA to UPA                              | 101/115 (87.8) | 101/109 (92.7) | 95/104 (91.3)  | 99/111 (89.2)  | 97/109 (89.0)  | 99/107 (92.5)  | 96/107 (89.7)  | 95/102 (93.1)  | 90/99 (90.9)   | 89/99 (89.9)   |                |
| UPA to ADA                              | 136/163 (83.4) | 127/159 (79.9) | 136/154 (88.3) | 133/152 (87.5) | 123/145 (84.8) | 124/144 (86.1) | 117/148 (79.1) | 122/147 (83.0) | 117/138 (84.8) | 121/139 (87.1) |                |
| <b>ACR50</b>                            |                |                |                |                |                |                |                |                |                |                |                |
| UPA continued                           | 250/284 (88.0) | 254/286 (88.8) | 254/284 (89.4) | 253/285 (88.8) | 244/280 (87.1) | 245/275 (89.1) | 239/277 (86.3) | 234/269 (87.0) | 236/268 (88.1) | 234/262 (89.3) |                |
| ADA continued                           | 91/111 (82.0)  | 88/110 (80.0)  | 95/110 (86.4)  | 95/113 (84.1)  | 91/109 (83.5)  | 86/104 (82.7)  | 93/104 (89.4)  | 93/105 (88.6)  | 87/99 (87.9)   | 87/101 (86.1)  |                |

|                        |                |                |                |                |                |                |                |                |                |                |
|------------------------|----------------|----------------|----------------|----------------|----------------|----------------|----------------|----------------|----------------|----------------|
| PBO to UPA             | 326/434 (75.1) | 333/436 (76.4) | 331/432 (76.6) | 331/439 (75.4) | 323/429 (75.3) | 329/427 (77.0) | 328/430 (76.3) | 326/421 (77.4) | 306/415 (73.7) | 302/410 (73.7) |
| ADA to UPA             | 85/114 (74.6)  | 83/107 (77.6)  | 76/104 (73.1)  | 76/110 (69.1)  | 75/107 (70.1)  | 80/105 (76.2)  | 79/105 (75.2)  | 75/100 (75.0)  | 71/99 (71.7)   | 71/98 (72.4)   |
| UPA to ADA             | 93/159 (58.5)  | 92/159 (57.9)  | 99/155 (63.9)  | 91/151 (60.3)  | 90/145 (62.1)  | 84/141 (59.6)  | 84/145 (57.9)  | 85/143 (59.4)  | 93/136 (68.4)  | 88/139 (63.3)  |
| ACR70                  |                |                |                |                |                |                |                |                |                |                |
| UPA continued          | 211/285 (74.0) | 205/287 (71.4) | 213/284 (75.0) | 211/284 (74.3) | 201/278 (72.3) | 203/277 (73.3) | 199/279 (71.3) | 201/272 (73.9) | 194/269 (72.1) | 189/258 (73.3) |
| ADA continued          | 71/107 (66.4)  | 73/109 (67.0)  | 74/108 (68.5)  | 75/111 (67.6)  | 74/107 (69.2)  | 67/104 (64.4)  | 76/102 (74.5)  | 76/103 (73.8)  | 70/97 (72.2)   | 76/98 (77.6)   |
| PBO to UPA             | 257/436 (58.9) | 246/439 (56.0) | 254/430 (59.1) | 263/441 (59.6) | 244/428 (57.0) | 251/423 (59.3) | 250/428 (58.4) | 258/424 (60.8) | 236/414 (57.0) | 241/408 (59.1) |
| ADA to UPA             | 60/113 (53.1)  | 53/109 (48.6)  | 57/106 (53.8)  | 56/109 (51.4)  | 53/107 (49.5)  | 54/104 (51.9)  | 51/101 (50.5)  | 50/98 (51.0)   | 47/99 (47.5)   | 50/98 (51.0)   |
| UPA to ADA             | 54/162 (33.3)  | 55/156 (35.3)  | 61/152 (40.1)  | 59/153 (38.6)  | 61/145 (42.1)  | 56/141 (39.7)  | 53/146 (36.3)  | 60/142 (42.3)  | 50/133 (37.6)  | 60/137 (43.8)  |
| $\Delta$ mTSS $\leq 0$ |                |                |                |                |                |                |                |                |                |                |
| UPA continued          | —              | —              | —              | 233/288 (80.9) | —              | —              | —              | —              | —              | —              |
| ADA continued          | —              | —              | —              | 85/109 (78.0)  | —              | —              | —              | —              | —              | —              |
| PBO to UPA             | —              | —              | —              | 341/442 (77.1) | —              | —              | —              | —              | —              | —              |
| ADA to UPA             | —              | —              | —              | 86/111 (77.5)  | —              | —              | —              | —              | —              | —              |
| UPA to ADA             | —              | —              | —              | 111/150 (74.0) | —              | —              | —              | —              | —              | —              |

Categorical data points of categorical endpoints analysed by treatment sequence AO, without imputation for missing data shown in Figure 2 (CDAI and

DAS28[CRP] responses), Figure 4 (ACR20/50/70 responses) and Figure 5 (radiographic outcomes).  $\Delta$ , change from baseline; ACR20/50/70,  $\geq 20/50/70\%$

improvement in American College of Rheumatology response criteria; ADA, adalimumab; AO, as observed; CDAI, Clinical Disease Activity Index; DAS28(CRP),

28-joint Disease Activity Score based on C-reactive protein; LDA, low disease activity; mTSS, modified Total Sharp Score; PBO, placebo; UPA, upadacitinib.

**Supplementary Table S10** Mean change from BL in core components of ACR criteria and mTSS through 264 weeks (AO)

| n/N (mean change from BL) | Weeks              |                    |                    |                    |                    |                    |                    |                    |                    |                    |                    |
|---------------------------|--------------------|--------------------|--------------------|--------------------|--------------------|--------------------|--------------------|--------------------|--------------------|--------------------|--------------------|
|                           | 12                 | 26                 | 48                 | 60                 | 72                 | 84                 | 96                 | 108                | 120                | 132                | 144                |
| <b>TJC68</b>              |                    |                    |                    |                    |                    |                    |                    |                    |                    |                    |                    |
| UPA continued             | 374/399<br>(-18.6) | 360/399<br>(-21.6) | 347/399<br>(-21.5) | 342/399<br>(-21.7) | 334/399<br>(-21.9) | 329/399<br>(-21.7) | 327/399<br>(-21.8) | 321/399<br>(-21.8) | 319/399<br>(-21.9) | 314/399<br>(-21.7) | 297/399<br>(-21.9) |
| ADA continued             | 155/168<br>(-17.6) | 137/168<br>(-20.9) | 134/168<br>(-20.6) | 132/168<br>(-21.2) | 130/168<br>(-21.1) | 128/168<br>(-20.7) | 127/168<br>(-21.1) | 124/168<br>(-20.9) | 122/168<br>(-21.4) | 118/168<br>(-21.1) | 117/168<br>(-21.1) |
| PBO to UPA                | 625/650<br>(-9.7)  | 607/650<br>(-17.5) | 582/650<br>(-20.9) | 570/650<br>(-21.7) | 553/650<br>(-22.3) | 540/650<br>(-22.5) | 527/650<br>(-22.7) | 516/650<br>(-22.8) | 505/650<br>(-23.2) | 491/650<br>(-23.4) | 469/650<br>(-23.6) |
| ADA to UPA                | 159/159<br>(-11.6) | 157/159<br>(-16.6) | 146/159<br>(-21.0) | 142/159<br>(-22.2) | 138/159<br>(-23.5) | 134/159<br>(-23.1) | 131/159<br>(-23.0) | 128/159<br>(-23.6) | 126/159<br>(-24.0) | 125/159<br>(-24.2) | 117/159<br>(-24.8) |
| UPA to ADA                | 250/252<br>(-13.8) | 248/252<br>(-17.9) | 237/248<br>(-21.9) | 223/252<br>(-23.0) | 207/252<br>(-23.8) | 203/252<br>(-24.2) | 194/252<br>(-24.4) | 186/252<br>(-24.8) | 185/252<br>(-25.0) | 183/252<br>(-24.5) | 178/252<br>(-24.9) |
| <b>SJC66</b>              |                    |                    |                    |                    |                    |                    |                    |                    |                    |                    |                    |
| UPA continued             | 374/399<br>(-13.2) | 360/399<br>(-14.8) | 347/399<br>(-14.9) | 342/399<br>(-14.9) | 334/399<br>(-15.0) | 329/399<br>(-14.8) | 327/399<br>(-15.0) | 321/399<br>(-14.9) | 319/399<br>(-14.8) | 314/399<br>(-14.8) | 297/399<br>(-15.0) |
| ADA continued             | 155/168<br>(-11.8) | 137/168<br>(-13.8) | 134/168<br>(-13.6) | 132/168<br>(-13.9) | 130/168<br>(-13.7) | 128/168<br>(-13.5) | 127/168<br>(-13.6) | 124/168<br>(-13.7) | 122/168<br>(-13.4) | 118/168<br>(-13.4) | 117/168<br>(-13.3) |
| PBO to UPA                | 625/650<br>(-7.0)  | 607/650<br>(-11.7) | 582/650<br>(-13.6) | 570/650<br>(-14.0) | 553/650<br>(-14.5) | 540/650<br>(-14.5) | 527/650<br>(-14.7) | 516/650<br>(-14.5) | 505/650<br>(-14.9) | 491/650<br>(-15.0) | 469/650<br>(-15.1) |
| ADA to UPA                | 159/159<br>(-9.0)  | 157/159<br>(-12.3) | 146/159<br>(-14.4) | 142/159<br>(-14.6) | 138/159<br>(-15.4) | 134/159<br>(-14.8) | 131/159<br>(-15.2) | 128/159<br>(-15.4) | 126/159<br>(-15.8) | 125/159<br>(-16.0) | 117/159<br>(-16.2) |
| UPA to ADA                | 250/252<br>(-9.0)  | 248/252<br>(-11.4) | 237/252<br>(-13.8) | 223/252<br>(-13.7) | 207/252<br>(-14.1) | 203/252<br>(-14.3) | 194/252<br>(-14.4) | 186/252<br>(-14.7) | 185/252<br>(-14.6) | 183/252<br>(-14.7) | 178/252<br>(-14.9) |
| <b>PtGA</b>               |                    |                    |                    |                    |                    |                    |                    |                    |                    |                    |                    |
| UPA continued             | 373/397<br>(-36.7) | 358/397<br>(-46.1) | 345/397<br>(-46.4) | 339/397<br>(-45.9) | 331/397<br>(-46.7) | 327/397<br>(-47.2) | 325/397<br>(-46.7) | 318/397<br>(-46.3) | 317/397<br>(-47.8) | 310/397<br>(-47.5) | 293/397<br>(-47.6) |
| ADA continued             | 155/168<br>(-29.1) | 137/168<br>(-41.9) | 134/168<br>(-42.7) | 132/168<br>(-41.5) | 130/168<br>(-42.1) | 128/168<br>(-41.1) | 125/168<br>(-41.0) | 124/168<br>(-44.4) | 123/168<br>(-41.4) | 118/168<br>(-45.3) | 117/168<br>(-45.2) |
| PBO to UPA                | 622/648<br>(-15.5) | 605/648<br>(-30.2) | 579/648<br>(-37.3) | 566/648<br>(-37.8) | 551/648<br>(-40.2) | 539/648<br>(-40.8) | 524/648<br>(-41.3) | 512/648<br>(-41.5) | 501/648<br>(-43.1) | 489/648<br>(-42.8) | 463/648<br>(-42.7) |
| ADA to UPA                | 157/157<br>(-20.7) | 156/157<br>(-28.9) | 145/157<br>(-38.6) | 140/157<br>(-38.5) | 137/157<br>(-40.1) | 132/157<br>(-40.1) | 129/157<br>(-44.0) | 127/157<br>(-40.6) | 125/157<br>(-43.4) | 124/157<br>(-42.0) | 116/157<br>(-45.4) |
| UPA to ADA                | 247/250<br>(-21.9) | 246/250<br>(-23.8) | 233/250<br>(-30.2) | 220/250<br>(-32.0) | 205/250<br>(-31.9) | 201/248<br>(-35.5) | 193/250<br>(-35.7) | 185/250<br>(-35.3) | 183/250<br>(-35.4) | 182/250<br>(-36.0) | 176/250<br>(-36.7) |
| <b>PhGA</b>               |                    |                    |                    |                    |                    |                    |                    |                    |                    |                    |                    |
| UPA continued             | 347/375<br>(-45.5) | 339/375<br>(-54.7) | 324/375<br>(-55.2) | 320/375<br>(-55.7) | 311/375<br>(-56.1) | 309/375<br>(-56.5) | 307/375<br>(-57.0) | 295/375<br>(-56.1) | 294/375<br>(-57.0) | 293/375<br>(-56.5) | 277/375<br>(-56.7) |
| ADA continued             | 141/160<br>(-39.5) | 132/160<br>(-48.9) | 126/160<br>(-50.9) | 125/160<br>(-51.1) | 120/160<br>(-52.6) | 122/160<br>(-52.2) | 120/160<br>(-51.5) | 116/160<br>(-53.3) | 114/160<br>(-51.7) | 110/160<br>(-52.3) | 110/160<br>(-53.7) |
| PBO to UPA                | 588/619<br>(-25.3) | 573/619<br>(-41.8) | 544/619<br>(-51.0) | 528/619<br>(-52.3) | 513/619<br>(-53.7) | 508/619<br>(-54.3) | 489/619<br>(-55.1) | 480/619<br>(-54.8) | 470/619<br>(-55.8) | 461/619<br>(-56.6) | 430/619<br>(-56.4) |

|                               |                    |                    |                    |                    |                    |                    |                    |                    |                    |                    |                    |
|-------------------------------|--------------------|--------------------|--------------------|--------------------|--------------------|--------------------|--------------------|--------------------|--------------------|--------------------|--------------------|
| ADA to UPA                    | 144/145<br>(-32.5) | 142/145<br>(-40.7) | 131/145<br>(-48.7) | 127/145<br>(-51.2) | 122/145<br>(-53.7) | 118/145<br>(-53.2) | 117/145<br>(-54.8) | 112/145<br>(-54.0) | 112/145<br>(-53.9) | 112/145<br>(-54.3) | 103/145<br>(-55.2) |
| UPA to ADA                    | 235/241<br>(-29.4) | 237/241<br>(-35.6) | 219/241<br>(-42.0) | 207/241<br>(-45.3) | 195/241<br>(-46.0) | 193/241<br>(-49.1) | 184/241<br>(-47.8) | 177/241<br>(-48.2) | 170/241<br>(-51.2) | 173/241<br>(-49.5) | 170/241<br>(-48.2) |
| Pain                          |                    |                    |                    |                    |                    |                    |                    |                    |                    |                    |                    |
| UPA continued                 | 373/397<br>(-37.8) | 358/397<br>(-46.1) | 345/397<br>(-46.6) | 339/397<br>(-46.5) | 331/397<br>(-47.1) | 327/397<br>(-48.1) | 325/397<br>(-47.4) | 318/397<br>(-47.6) | 317/397<br>(-47.9) | 310/397<br>(-47.3) | 293/397<br>(-47.7) |
| ADA continued                 | 155/168<br>(-31.5) | 137/168<br>(-44.1) | 134/168<br>(-43.8) | 132/168<br>(-42.5) | 130/168<br>(-42.3) | 128/168<br>(-42.1) | 125/168<br>(-42.6) | 124/168<br>(-44.1) | 123/168<br>(-42.9) | 118/168<br>(-44.8) | 117/168<br>(-44.7) |
| PBO to UPA                    | 622/648<br>(-15.6) | 605/648<br>(-31.4) | 579/648<br>(-39.3) | 566/648<br>(-39.4) | 551/648<br>(-41.5) | 539/648<br>(-41.9) | 524/648<br>(-41.9) | 512/648<br>(-42.5) | 501/648<br>(-43.2) | 489/648<br>(-43.0) | 463/648<br>(-43.1) |
| ADA to UPA                    | 157/157<br>(-21.2) | 156/157<br>(-28.9) | 145/157<br>(-39.3) | 140/157<br>(-38.1) | 137/157<br>(-41.4) | 132/157<br>(-40.8) | 130/157<br>(-44.3) | 127/157<br>(-41.2) | 125/157<br>(-41.3) | 124/157<br>(-41.7) | 116/157<br>(-43.4) |
| UPA to ADA                    | 247/250<br>(-24.1) | 246/250<br>(-26.2) | 233/250<br>(-32.5) | 220/250<br>(-34.3) | 205/250<br>(-33.3) | 201/250<br>(-36.4) | 193/250<br>(-37.9) | 185/250<br>(-38.2) | 183/250<br>(-38.7) | 182/250<br>(-37.7) | 176/250<br>(-39.2) |
| HAQ-DI                        |                    |                    |                    |                    |                    |                    |                    |                    |                    |                    |                    |
| UPA continued                 | 373/397<br>(-0.80) | 358/397<br>(-0.93) | 345/397<br>(-0.99) | 339/397<br>(-0.98) | 331/397<br>(-1.00) | 327/397<br>(-1.02) | 325/397<br>(-1.01) | 318/397<br>(-1.01) | 316/397<br>(-1.02) | 310/397<br>(-1.00) | 293/397<br>(-1.01) |
| ADA continued                 | 155/168<br>(-0.63) | 137/168<br>(-0.79) | 134/168<br>(-0.79) | 132/168<br>(-0.84) | 130/168<br>(-0.83) | 128/168<br>(-0.78) | 125/168<br>(-0.82) | 124/168<br>(-0.84) | 123/168<br>(-0.82) | 118/168<br>(-0.79) | 117/168<br>(-0.83) |
| PBO to UPA                    | 622/648<br>(-0.32) | 604/648<br>(-0.59) | 579/648<br>(-0.76) | 566/648<br>(-0.77) | 551/648<br>(-0.81) | 539/648<br>(-0.82) | 524/648<br>(-0.84) | 512/648<br>(-0.82) | 501/648<br>(-0.86) | 488/648<br>(-0.84) | 463/648<br>(-0.86) |
| ADA to UPA                    | 157/157<br>(-0.46) | 156/157<br>(-0.60) | 145/157<br>(-0.75) | 140/157<br>(-0.98) | 137/157<br>(-0.84) | 132/157<br>(-0.79) | 130/157<br>(-0.84) | 127/157<br>(-0.84) | 125/157<br>(-0.84) | 124/157<br>(-0.84) | 116/157<br>(-0.91) |
| UPA to ADA                    | 246/249<br>(-0.43) | 245/249<br>(-0.51) | 232/249<br>(-0.59) | 219/249<br>(-0.67) | 204/249<br>(-0.67) | 200/249<br>(-0.70) | 192/249<br>(-0.73) | 184/249<br>(-0.73) | 181/249<br>(-0.75) | 181/249<br>(-0.70) | 175/249<br>(-0.71) |
| hsCRP                         |                    |                    |                    |                    |                    |                    |                    |                    |                    |                    |                    |
| UPA continued                 | 357/399<br>(-12.9) | 361/399<br>(-13.8) | 346/399<br>(-12.2) | 335/399<br>(-12.3) | 330/399<br>(-13.2) | 324/399<br>(-13.8) | 320/399<br>(-12.3) | 315/399<br>(-13.6) | 312/399<br>(-13.1) | 310/399<br>(-12.9) | 283/399<br>(-13.5) |
| ADA continued                 | 146/167<br>(-8.4)  | 137/167<br>(-10.4) | 134/167<br>(-9.3)  | 130/167<br>(-8.0)  | 128/167<br>(-9.5)  | 127/167<br>(-8.2)  | 124/167<br>(-9.1)  | 123/167<br>(-9.2)  | 121/167<br>(-8.8)  | 115/167<br>(-7.0)  | 112/167<br>(-7.9)  |
| PBO to UPA                    | 595/650<br>(-1.8)  | 605/650<br>(-8.1)  | 578/650<br>(-11.9) | 563/650<br>(-13.1) | 550/650<br>(-12.4) | 527/650<br>(-12.2) | 510/650<br>(-12.6) | 502/650<br>(-13.9) | 499/650<br>(-12.9) | 474/650<br>(-13.4) | 435/650<br>(-13.5) |
| ADA to UPA                    | 153/159<br>(-12.5) | 157/159<br>(-15.1) | 146/159<br>(-17.1) | 140/159<br>(-17.6) | 134/159<br>(-17.5) | 132/159<br>(-16.8) | 129/159<br>(-15.8) | 120/159<br>(-17.1) | 124/159<br>(-17.1) | 116/159<br>(-17.8) | 108/159<br>(-18.7) |
| UPA to ADA                    | 233/252<br>(-12.4) | 248/252<br>(-12.1) | 237/252<br>(-10.4) | 219/252<br>(-9.9)  | 206/252<br>(-10.7) | 201/252<br>(-10.6) | 188/252<br>(-10.2) | 182/252<br>(-9.7)  | 181/252<br>(-10.5) | 177/252<br>(-12.5) | 164/252<br>(-12.6) |
| ΔmTSS                         |                    |                    |                    |                    |                    |                    |                    |                    |                    |                    |                    |
| UPA continued                 | —                  | 282 (0.14)         | —                  | —                  | —                  | —                  | 292 (0.37)         | —                  | —                  | —                  | —                  |
| ADA continued                 | —                  | 112 (0.04)         | —                  | —                  | —                  | —                  | 114 (0.43)         | —                  | —                  | —                  | —                  |
| PBO to UPA                    | —                  | 435 (0.37)         | —                  | —                  | —                  | —                  | 446 (0.70)         | —                  | —                  | —                  | —                  |
| ADA to UPA                    | —                  | 112 (0.17)         | —                  | —                  | —                  | —                  | 113 (0.63)         | —                  | —                  | —                  | —                  |
| UPA to ADA                    | —                  | 150 (0.33)         | —                  | —                  | —                  | —                  | 152 (1.03)         | —                  | —                  | —                  | —                  |
| Severity of morning stiffness |                    |                    |                    |                    |                    |                    |                    |                    |                    |                    |                    |

|                                             |                     |                     |                     |                     |                     |                     |                     |                     |                     |                     |                     |
|---------------------------------------------|---------------------|---------------------|---------------------|---------------------|---------------------|---------------------|---------------------|---------------------|---------------------|---------------------|---------------------|
| <b>(0–10 NRS)</b>                           |                     |                     |                     |                     |                     |                     |                     |                     |                     |                     |                     |
| UPA continued                               | 374/399<br>(-4.2)   | 360/399<br>(-4.9)   | 347/399<br>(-4.9)   | 342/399<br>(-5.0)   | 333/399<br>(-5.0)   | 328/399<br>(-5.1)   | 325/399<br>(-5.2)   | 320/399<br>(-5.2)   | 317/399<br>(-5.1)   | 313/399<br>(-5.0)   | 299/399<br>(-5.1)   |
| ADA continued                               | 154/167<br>(-3.4)   | 135/167<br>(-4.3)   | 133/167<br>(-4.6)   | 131/167<br>(-4.5)   | 129/167<br>(-4.5)   | 127/167<br>(-4.5)   | 125/167<br>(-4.5)   | 123/167<br>(-4.7)   | 122/167<br>(-4.5)   | 117/167<br>(-4.6)   | 117/167<br>(-4.6)   |
| PBO to UPA                                  | 625/650<br>(-1.9)   | 607/650<br>(-3.4)   | 581/650<br>(-4.4)   | 563/650<br>(-4.4)   | 554/650<br>(-4.6)   | 540/650<br>(-4.6)   | 525/650<br>(-4.7)   | 516/650<br>(-4.7)   | 504/650<br>(-4.8)   | 491/650<br>(-4.8)   | 470/650<br>(-4.9)   |
| ADA to UPA                                  | 157/157<br>(-2.5)   | 155/157<br>(-3.5)   | 143/157<br>(-4.0)   | 139/157<br>(-4.3)   | 136/157<br>(-4.6)   | 130/157<br>(-4.4)   | 129/157<br>(-4.8)   | 126/157<br>(-4.6)   | 125/157<br>(-4.6)   | 123/157<br>(-4.6)   | 116/157<br>(-4.7)   |
| UPA to ADA                                  | 248/249<br>(-2.5)   | 246/249<br>(-3.1)   | 234/249<br>(-3.6)   | 219/249<br>(-3.7)   | 204/249<br>(-3.8)   | 200/249<br>(-3.9)   | 191/249<br>(-3.9)   | 183/249<br>(-4.0)   | 183/249<br>(-4.1)   | 180/249<br>(-4.1)   | 177/249<br>(-4.2)   |
| <b>Duration of morning stiffness (mins)</b> |                     |                     |                     |                     |                     |                     |                     |                     |                     |                     |                     |
| UPA continued                               | 375/399<br>(-112.5) | 360/399<br>(-125.0) | 347/399<br>(-127.7) | 342/399<br>(-121.9) | 333/399<br>(-128.0) | 328/399<br>(-131.7) | 327/399<br>(-131.5) | 320/399<br>(-132.4) | 319/399<br>(-130.8) | 314/399<br>(-131.3) | 297/399<br>(-132.8) |
| ADA continued                               | 154/167<br>(-83.5)  | 136/167<br>(-101.5) | 133/167<br>(-103.6) | 131/167<br>(-95.3)  | 129/167<br>(-96.5)  | 127/167<br>(-85.9)  | 125/167<br>(-98.9)  | 123/167<br>(-87.0)  | 122/167<br>(-86.0)  | 177/167<br>(-87.1)  | 114/167<br>(-98.6)  |
| PBO to UPA                                  | 625/650<br>(-51.8)  | 607/650<br>(-89.5)  | 582/650<br>(-112.9) | 565/650<br>(-111.4) | 554/650<br>(-116.7) | 541/650<br>(-117.9) | 526/650<br>(-122.4) | 516/650<br>(-120.8) | 505/650<br>(-122.0) | 491/650<br>(-124.9) | 456/650<br>(-131.3) |
| ADA to UPA                                  | 157/157<br>(-91.7)  | 155/157<br>(-111.4) | 144/157<br>(-125.0) | 140/157<br>(-133.4) | 136/157<br>(-132.8) | 131/157<br>(-137.8) | 129/157<br>(-141.4) | 126/157<br>(-135.2) | 125/157<br>(-144.6) | 124/157<br>(-144.2) | 116/157<br>(-152.7) |
| UPA to ADA                                  | 249/250<br>(-62.6)  | 247/250<br>(-67.0)  | 236/250<br>(-93.6)  | 221/250<br>(-101.9) | 206/250<br>(-101.6) | 200/250<br>(-100.9) | 193/250<br>(-96.4)  | 184/250<br>(-100.4) | 184/250<br>(-106.0) | 181/250<br>(-110.4) | 164/250<br>(-109.9) |
| <b>Weeks</b>                                |                     |                     |                     |                     |                     |                     |                     |                     |                     |                     |                     |
| <b>n/N (mean change from BL)</b>            | <b>156</b>          | <b>168</b>          | <b>180</b>          | <b>192</b>          | <b>204</b>          | <b>216</b>          | <b>228</b>          | <b>240</b>          | <b>252</b>          | <b>264</b>          |                     |
| <b>TJC68</b>                                |                     |                     |                     |                     |                     |                     |                     |                     |                     |                     |                     |
| UPA continued                               | 291/399<br>(-21.8)  | 293/399<br>(-22.2)  | 290/399<br>(-21.7)  | 289/399<br>(-21.6)  | 284/399<br>(-21.6)  | 281/399<br>(-21.8)  | 282/399<br>(-21.6)  | 277/399<br>(-21.8)  | 275/399<br>(-21.4)  | 269/399<br>(-22.1)  |                     |
| ADA continued                               | 113/168<br>(-21.5)  | 112/168<br>(-21.7)  | 112/168<br>(-21.1)  | 113/168<br>(-21.2)  | 109/168<br>(-21.5)  | 106/168<br>(-21.4)  | 105/168<br>(-21.9)  | 106/168<br>(-21.9)  | 101/168<br>(-22.0)  | 101/168<br>(-22.0)  |                     |
| PBO to UPA                                  | 448/650<br>(-23.5)  | 456/650<br>(-23.4)  | 450/650<br>(-23.6)  | 453/650<br>(-23.5)  | 445/650<br>(-23.7)  | 439/650<br>(-23.7)  | 441/650<br>(-23.7)  | 431/650<br>(-23.4)  | 426/650<br>(-23.2)  | 422/650<br>(-23.5)  |                     |
| ADA to UPA                                  | 117/159<br>(-24.8)  | 114/159<br>(-25.8)  | 110/159<br>(-25.6)  | 113/159<br>(-25.0)  | 111/159<br>(-25.6)  | 109/159<br>(-25.8)  | 108/159<br>(-26.0)  | 103/159<br>(-26.1)  | 103/159<br>(-26.2)  | 100/159<br>(-25.9)  |                     |
| UPA to ADA                                  | 164/252<br>(-24.7)  | 162/252<br>(-24.9)  | 157/252<br>(-25.5)  | 155/252<br>(-25.8)  | 149/252<br>(-26.5)  | 145/252<br>(-26.7)  | 147/252<br>(-26.5)  | 149/252<br>(-26.4)  | 143/252<br>(-27.3)  | 141/252<br>(-27.6)  |                     |
| <b>SIC66</b>                                |                     |                     |                     |                     |                     |                     |                     |                     |                     |                     |                     |
| UPA continued                               | 291/399<br>(-15.0)  | 293/399<br>(-15.1)  | 290/399<br>(-14.7)  | 289/399<br>(-14.9)  | 284/399<br>(-14.6)  | 281/399<br>(-14.9)  | 282/399<br>(-14.8)  | 277/399<br>(-14.8)  | 275/399<br>(-14.5)  | 269/399<br>(-15.0)  |                     |
| ADA continued                               | 113/168<br>(-13.6)  | 112/168<br>(-13.8)  | 112/168<br>(-13.7)  | 113/168<br>(-13.1)  | 109/168<br>(-13.9)  | 106/168<br>(-13.4)  | 105/168<br>(-13.6)  | 106/168<br>(-13.7)  | 101/168<br>(-13.6)  | 101/168<br>(-13.5)  |                     |
| PBO to UPA                                  | 448/650<br>(-14.9)  | 456/650<br>(-14.9)  | 450/650<br>(-15.0)  | 453/650<br>(-15.0)  | 445/650<br>(-15.3)  | 439/650<br>(-15.2)  | 441/650<br>(-15.2)  | 431/650<br>(-15.2)  | 426/650<br>(-15.2)  | 422/650<br>(-15.1)  |                     |

|               |                    |                    |                    |                    |                    |                    |                    |                    |                    |                    |
|---------------|--------------------|--------------------|--------------------|--------------------|--------------------|--------------------|--------------------|--------------------|--------------------|--------------------|
| ADA to UPA    | 117/159<br>(-16.3) | 114/159<br>(-16.6) | 110/159<br>(-16.4) | 113/159<br>(-16.0) | 111/159<br>(-16.5) | 109/159<br>(-16.9) | 108/159<br>(-16.3) | 103/159<br>(-16.8) | 103/159<br>(-16.9) | 100/159<br>(-16.9) |
| UPA to ADA    | 164/252<br>(-14.4) | 162/252<br>(-14.8) | 157/252<br>(-15.4) | 155/252<br>(-15.2) | 149/252<br>(-15.4) | 145/252<br>(-15.4) | 147/252<br>(-15.6) | 149/252<br>(-15.5) | 143/252<br>(-16.0) | 141/252<br>(-16.2) |
| PtGA          |                    |                    |                    |                    |                    |                    |                    |                    |                    |                    |
| UPA continued | 288/397<br>(-48.4) | 289/397<br>(-48.9) | 289/397<br>(-48.4) | 286/397<br>(-48.6) | 281/397<br>(-48.2) | 279/397<br>(-48.2) | 280/397<br>(-47.5) | 273/397<br>(-47.8) | 271/397<br>(-47.4) | 265/397<br>(-48.9) |
| ADA continued | 112/168<br>(-44.4) | 112/168<br>(-45.7) | 111/168<br>(-47.6) | 113/168<br>(-47.8) | 109/168<br>(-47.0) | 106/168<br>(-45.7) | 105/168<br>(-49.4) | 105/168<br>(-49.5) | 99/168<br>(-48.1)  | 101/168<br>(-47.9) |
| PBO to UPA    | 445/648<br>(-43.6) | 450/648<br>(-42.8) | 441/648<br>(-44.2) | 447/648<br>(-43.7) | 440/648<br>(-43.0) | 433/648<br>(-44.2) | 437/648<br>(-43.2) | 428/648<br>(-44.0) | 419/648<br>(-42.8) | 417/648<br>(-42.6) |
| ADA to UPA    | 115/157<br>(-45.6) | 111/157<br>(-45.0) | 109/157<br>(-47.3) | 112/157<br>(-43.5) | 109/157<br>(-44.7) | 107/157<br>(-45.9) | 107/157<br>(-45.0) | 102/157<br>(-45.6) | 101/157<br>(-42.8) | 99/157<br>(-45.5)  |
| UPA to ADA    | 164/250<br>(-35.7) | 161/250<br>(-36.0) | 156/250<br>(-37.5) | 154/250<br>(-36.9) | 147/250<br>(-37.8) | 145/250<br>(-37.2) | 148/250<br>(-34.8) | 148/250<br>(-38.3) | 139/250<br>(-38.9) | 140/250<br>(-38.5) |
| PhGA          |                    |                    |                    |                    |                    |                    |                    |                    |                    |                    |
| UPA continued | 268/375<br>(-56.8) | 275/375<br>(-56.0) | 273/375<br>(-56.1) | 269/375<br>(-55.1) | 266/375<br>(-55.0) | 264/375<br>(-56.2) | 262/375<br>(-55.6) | 256/375<br>(-56.7) | 251/375<br>(-55.5) | 247/375<br>(-56.7) |
| ADA continued | 105/160<br>(-54.2) | 106/160<br>(-53.7) | 106/160<br>(-53.8) | 106/160<br>(-53.5) | 104/160<br>(-53.0) | 101/160<br>(-52.5) | 99/160<br>(-55.0)  | 100/160<br>(-52.5) | 92/160<br>(-55.1)  | 94/160<br>(-53.7)  |
| PBO to UPA    | 418/619<br>(-56.4) | 420/619<br>(-57.1) | 411/619<br>(-56.6) | 410/619<br>(-56.1) | 412/619<br>(-56.6) | 408/619<br>(-56.1) | 409/619<br>(-56.1) | 399/619<br>(-56.3) | 392/619<br>(-55.1) | 393/619<br>(-54.3) |
| ADA to UPA    | 102/145<br>(-55.9) | 102/145<br>(-56.2) | 99/145<br>(-56.6)  | 99/145<br>(-55.2)  | 99/145<br>(-55.9)  | 98/145<br>(-54.6)  | 96/145<br>(-54.9)  | 92/145<br>(-57.5)  | 92/145<br>(-56.8)  | 90/145<br>(-56.4)  |
| UPA to ADA    | 152/241<br>(-51.0) | 153/241<br>(-50.3) | 145/241<br>(-51.8) | 147/241<br>(-50.7) | 142/241<br>(-51.7) | 137/241<br>(-51.1) | 140/241<br>(-51.6) | 137/241<br>(-52.5) | 131/241<br>(-54.7) | 132/241<br>(-55.2) |
| Pain          |                    |                    |                    |                    |                    |                    |                    |                    |                    |                    |
| UPA continued | 288/397<br>(-49.0) | 289/397<br>(-49.2) | 289/397<br>(-48.0) | 286/397<br>(-48.6) | 281/397<br>(-48.7) | 279/397<br>(-48.9) | 280/397<br>(-47.6) | 273/397<br>(-48.5) | 271/397<br>(-48.8) | 265/397<br>(-48.4) |
| ADA continued | 112/168<br>(-42.6) | 112/168<br>(-44.4) | 111/168<br>(-46.8) | 113/168<br>(-47.3) | 109/168<br>(-46.7) | 106/168<br>(-44.6) | 105/168<br>(-47.8) | 105/168<br>(-49.0) | 99/168<br>(-46.8)  | 101/168<br>(-47.6) |
| PBO to UPA    | 445/648<br>(-44.2) | 450/648<br>(-43.1) | 441/648<br>(-44.4) | 447/648<br>(-44.0) | 440/648<br>(-42.8) | 433/648<br>(-43.5) | 437/648<br>(-43.3) | 428/648<br>(-45.1) | 419/648<br>(-43.6) | 417/648<br>(-43.2) |
| ADA to UPA    | 115/157<br>(-44.8) | 111/157<br>(-44.5) | 109/157<br>(-45.8) | 112/157<br>(-43.5) | 109/157<br>(-43.8) | 107/157<br>(-44.9) | 107/157<br>(-43.6) | 102/157<br>(-43.0) | 101/157<br>(-41.8) | 99/157<br>(-44.0)  |
| UPA to ADA    | 164/250<br>(-39.0) | 161/250<br>(-39.5) | 156/250<br>(-40.3) | 154/250<br>(-39.7) | 147/250<br>(-41.1) | 145/250<br>(-40.7) | 148/250<br>(-37.3) | 148/250<br>(-41.0) | 139/250<br>(-41.0) | 140/250<br>(-41.3) |
| HAQ-DI        |                    |                    |                    |                    |                    |                    |                    |                    |                    |                    |
| UPA continued | 288/397<br>(-1.00) | 289/397<br>(-1.00) | 289/397<br>(-0.99) | 286/397<br>(-1.01) | 281/397<br>(-1.01) | 279/397<br>(-0.98) | 280/397<br>(-0.99) | 273/397<br>(-1.00) | 271/397<br>(-0.98) | 265/397<br>(-0.98) |
| ADA continued | 112/168<br>(-0.84) | 112/168<br>(-0.83) | 110/168<br>(-0.90) | 113/168<br>(-0.85) | 109/168<br>(-0.89) | 106/168<br>(-0.80) | 105/168<br>(-0.88) | 105/168<br>(-0.91) | 99/168<br>(-0.85)  | 101/168<br>(-0.88) |
| PBO to UPA    | 444/648<br>(-0.86) | 448/648<br>(-0.86) | 441/648<br>(-0.86) | 447/648<br>(-0.86) | 440/648<br>(-0.86) | 433/648<br>(-0.87) | 436/648<br>(-0.88) | 428/648<br>(-0.87) | 419/648<br>(-0.86) | 417/648<br>(-0.86) |
| ADA to UPA    | 115/157            | 111/157            | 109/157            | 112/157            | 109/157            | 107/157            | 107/157            | 102/157            | 101/157            | 99/157             |

|                                          |                               |                               |                               |                               |                               |                               |                               |                               |                               |                               |
|------------------------------------------|-------------------------------|-------------------------------|-------------------------------|-------------------------------|-------------------------------|-------------------------------|-------------------------------|-------------------------------|-------------------------------|-------------------------------|
| UPA to ADA                               | (-0.91)<br>163/249<br>(-0.75) | (-0.92)<br>160/249<br>(-0.70) | (-0.92)<br>155/249<br>(-0.77) | (-0.91)<br>153/249<br>(-0.73) | (-0.91)<br>146/249<br>(-0.74) | (-0.86)<br>144/249<br>(-0.75) | (-0.84)<br>147/249<br>(-0.70) | (-0.83)<br>147/249<br>(-0.76) | (-0.87)<br>138/249<br>(-0.75) | (-0.89)<br>138/249<br>(-0.78) |
| hsCRP                                    |                               |                               |                               |                               |                               |                               |                               |                               |                               |                               |
| UPA continued                            | 268/399<br>(-14.1)            | 271/399<br>(-13.4)            | 262/399<br>(-13.8)            | 264/399<br>(-13.5)            | 262/399<br>(-12.7)            | 259/399<br>(-12.6)            | 269/399<br>(-11.9)            | 256/399<br>(-12.5)            | 257/399<br>(-13.1)            | 252/399<br>(-12.3)            |
| ADA continued                            | 101/167<br>(-9.5)             | 96/167<br>(-10.2)             | 96/167<br>(-9.8)              | 103/167<br>(-9.3)             | 98/167<br>(-9.7)              | 94/167<br>(-7.6)              | 92/167<br>(-7.3)              | 97/167<br>(-10.3)             | 90/167<br>(-8.2)              | 95/167<br>(-10.0)             |
| PBO to UPA                               | 406/650<br>(-14.9)            | 403/650<br>(-13.5)            | 405/650<br>(-14.0)            | 417/650<br>(-13.9)            | 410/650<br>(-13.5)            | 395/650<br>(-14.5)            | 414/650<br>(-13.7)            | 404/650<br>(-13.8)            | 389/650<br>(-12.7)            | 390/650<br>(-13.6)            |
| ADA to UPA                               | 107/159<br>(-18.4)            | 100/159<br>(-21.1)            | 95/159<br>(-19.5)             | 105/159<br>(-18.0)            | 102/159<br>(-16.5)            | 101/159<br>(-17.3)            | 102/159<br>(-17.1)            | 97/159<br>(-16.0)             | 94/159<br>(-13.1)             | 93/159<br>(-19.3)             |
| UPA to ADA                               | 153/252<br>(-12.0)            | 148/252<br>(-10.3)            | 145/252<br>(-13.3)            | 145/252<br>(-11.7)            | 137/252<br>(-12.5)            | 137/252<br>(-13.1)            | 140/252<br>(-9.7)             | 139/252<br>(-13.3)            | 134/252<br>(-12.3)            | 132/252<br>(-13.3)            |
| ΔmTSS                                    |                               |                               |                               |                               |                               |                               |                               |                               |                               |                               |
| UPA continued                            | —                             | —                             | —                             | 288 (0.53)                    | —                             | —                             | —                             | —                             | —                             | —                             |
| ADA continued                            | —                             | —                             | —                             | 109 (1.18)                    | —                             | —                             | —                             | —                             | —                             | —                             |
| PBO to UPA                               | —                             | —                             | —                             | 442 (1.27)                    | —                             | —                             | —                             | —                             | —                             | —                             |
| ADA to UPA                               | —                             | —                             | —                             | 111 (0.88)                    | —                             | —                             | —                             | —                             | —                             | —                             |
| UPA to ADA                               | —                             | —                             | —                             | 150 (1.72)                    | —                             | —                             | —                             | —                             | —                             | —                             |
| Severity of morning stiffness (0–10 NRS) |                               |                               |                               |                               |                               |                               |                               |                               |                               |                               |
| UPA continued                            | 297/399<br>(-5.2)             | 295/399<br>(-5.1)             | 291/399<br>(-5.1)             | 289/399<br>(-5.1)             | 285/399<br>(-5.0)             | 282/399<br>(-5.2)             | 283/399<br>(-5.1)             | 227/399<br>(-5.2)             | 275/399<br>(-5.1)             | 268/399<br>(-5.1)             |
| ADA continued                            | 114/167<br>(-4.6)             | 111/167<br>(-4.8)             | 111/167<br>(-4.8)             | 112/167<br>(-4.8)             | 108/167<br>(-4.6)             | 106/167<br>(-4.7)             | 105/167<br>(-4.8)             | 105/167<br>(-4.8)             | 101/167<br>(-4.9)             | 101/167<br>(-4.8)             |
| PBO to UPA                               | 456/650<br>(-4.8)             | 456/650<br>(-4.8)             | 451/650<br>(-4.9)             | 453/650<br>(-4.8)             | 444/650<br>(-4.8)             | 439/650<br>(-4.9)             | 440/650<br>(-4.8)             | 431/650<br>(-4.8)             | 425/650<br>(-4.9)             | 422/650<br>(-4.8)             |
| ADA to UPA                               | 116/157<br>(-4.8)             | 115/157<br>(-4.9)             | 110/157<br>(-4.8)             | 112/157<br>(-4.9)             | 110/157<br>(-4.7)             | 108/157<br>(-4.9)             | 107/157<br>(-4.8)             | 102/157<br>(-4.6)             | 101/157<br>(-4.7)             | 100/157<br>(-4.7)             |
| UPA to ADA                               | 162/249<br>(-4.0)             | 161/249<br>(-4.2)             | 156/249<br>(-4.2)             | 155/249<br>(-4.4)             | 147/249<br>(-4.2)             | 146/249<br>(-4.4)             | 146/249<br>(-4.3)             | 148/249<br>(-4.1)             | 142/249<br>(-4.3)             | 141/249<br>(-4.4)             |
| Duration of morning stiffness (mins)     |                               |                               |                               |                               |                               |                               |                               |                               |                               |                               |
| UPA continued                            | 297/399<br>(-132.8)           | 295/399<br>(-132.0)           | 292/399<br>(-134.4)           | 289/399<br>(-133.8)           | 285/399<br>(-132.6)           | 282/399<br>(-136.8)           | 283/399<br>(-133.1)           | 277/399<br>(-135.3)           | 275/399<br>(-135.1)           | 268/399<br>(-137.1)           |
| ADA continued                            | 114/167<br>(-98.6)            | 111/167<br>(-102.4)           | 111/167<br>(-102.6)           | 112/167<br>(-102.4)           | 108/167<br>(-83.3)            | 106/167<br>(-97.9)            | 105/167<br>(-91.8)            | 106/167<br>(-104.3)           | 101/167<br>(-103.4)           | 101/167<br>(-100.9)           |
| PBO to UPA                               | 456/650<br>(-131.3)           | 456/650<br>(-122.6)           | 451/650<br>(-131.2)           | 454/650<br>(-124.4)           | 444/650<br>(-128.6)           | 439/650<br>(-126.5)           | 441/650<br>(-125.5)           | 431/650<br>(-129.2)           | 425/650<br>(-122.8)           | 422/650<br>(-127.2)           |
| ADA to UPA                               | 116/157<br>(-152.7)           | 115/157<br>(-155.2)           | 110/157<br>(-148.5)           | 112/157<br>(-148.9)           | 110/157<br>(-150.5)           | 108/157<br>(-142.1)           | 107/157<br>(-141.5)           | 102/157<br>(-138.2)           | 101/157<br>(-135.4)           | 100/157<br>(-124.6)           |
| UPA to ADA                               | 164/250                       | 162/250                       | 157/250                       | 156/250                       | 148/250                       | 145/250                       | 147/250                       | 149/250                       | 143/250                       | 142/250                       |



|          |          |         |          |          |          |          |          |          |          |
|----------|----------|---------|----------|----------|----------|----------|----------|----------|----------|
| (-109.9) | (-108.1) | (-99.3) | (-116.5) | (-110.7) | (-120.8) | (-117.4) | (-114.3) | (-117.2) | (-117.1) |
|----------|----------|---------|----------|----------|----------|----------|----------|----------|----------|

Categorical data points of categorical endpoints analysed by treatment sequence AO, without imputation for missing data shown in Figure 5 (radiographic outcomes), supplementary figure S3 (ACR components) and supplementary figure S4 (morning stiffness).  $\Delta$ , change from baseline; ACR, American College of Rheumatology; ADA, adalimumab; AO, as observed; BL, baseline; HAQ-DI, Health Assessment Questionnaire – Disability Index; hsCRP, high-sensitivity C-reactive protein; mTSS, modified Total Sharp Score; NRS, numerical rating scale; PBO, placebo; PhGA, physician’s global assessment of disease activity; PtGA, patient’s global assessment of disease activity; SJC66, swollen joint count based on 66 joints; TJC68, tender joint count based on 68 joints; UPA, upadacitinib.

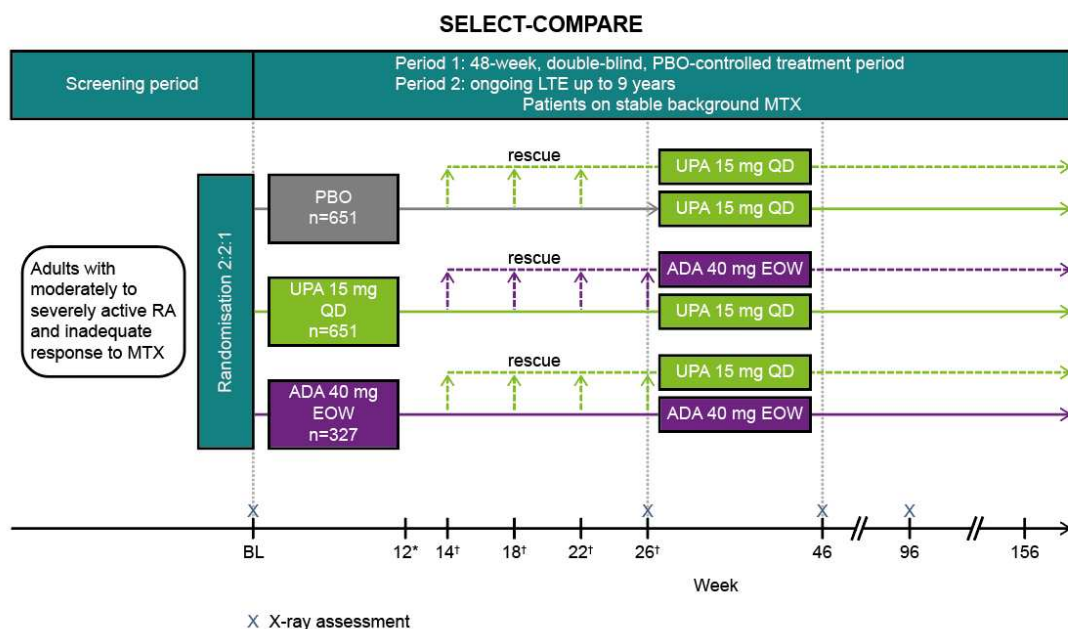

**Supplementary Figure S1** SELECT-COMPARE study design. Patients continued treatment with UPA or ADA in a blinded manner until the last patient completed the week 48 visit; patients received open-label treatment of the study drug they were assigned to thereafter. \*Primary endpoints at week 12: ACR20 (Food and Drug Administration) and DAS28(CRP) <2.6 (European Medicines Agency). †Rescue: at weeks 14, 18 and 22 if <20% improvement in TJC66 or SJC68 versus BL; at week 26 if CDAI >10. ACR20, ≥20% improvement in American College of Rheumatology response criteria; ADA, adalimumab; BL, baseline; CDAI, Clinical Disease Activity Index; DAS28(CRP), 28-joint Disease Activity Score based on C-reactive protein; EOW, every other week; LTE, long-term extension; MTX, methotrexate; PBO, placebo; QD, once daily; RA, rheumatoid arthritis; SJC66, swollen joint count based on 66 joints; TJC68, tender joint count based on 68 joints; UPA, upadacitinib.

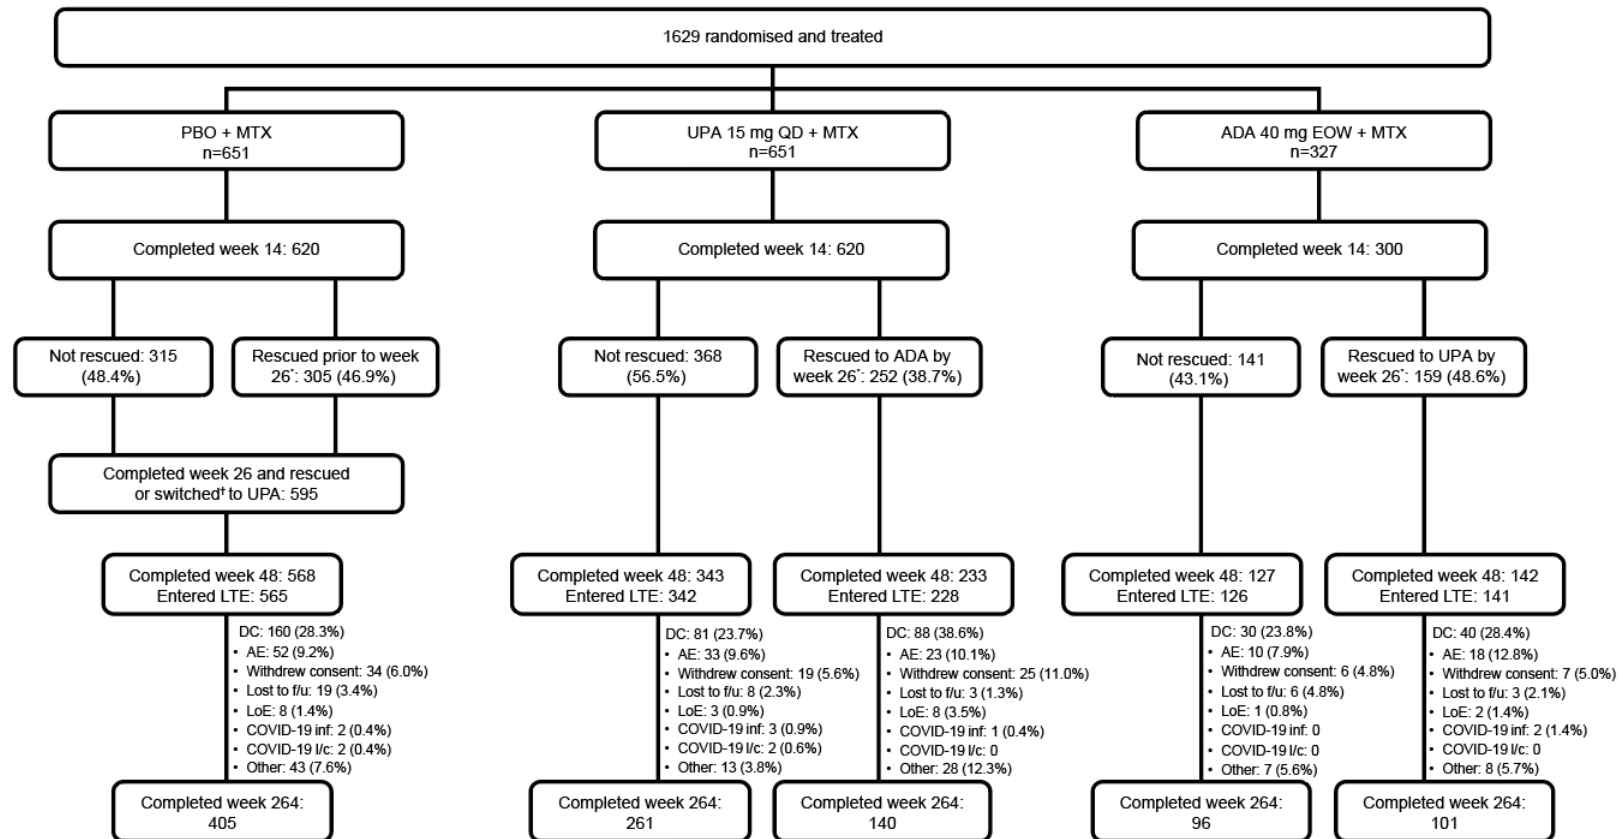

**Supplementary Figure S2** Patient disposition through 264 weeks. Number of patients on study drug, with primary reason for discontinuation summarised during long-term extension through 264 weeks. \*Rescue occurred only before or at week 26; no rescue was allowed after week 26. †All PBO patients not previously rescued (at weeks 14, 18 or 22) were switched to UPA at week 26. ADA, adalimumab; AE, adverse event; DC, discontinued; EOW, every other week; f/u, follow-up; inf, infection; l/c, logistical restrictions; LoE, lack of efficacy; LTE, long-term extension; MTX, methotrexate; PBO, placebo; QD, once daily; UPA, upadacitinib.

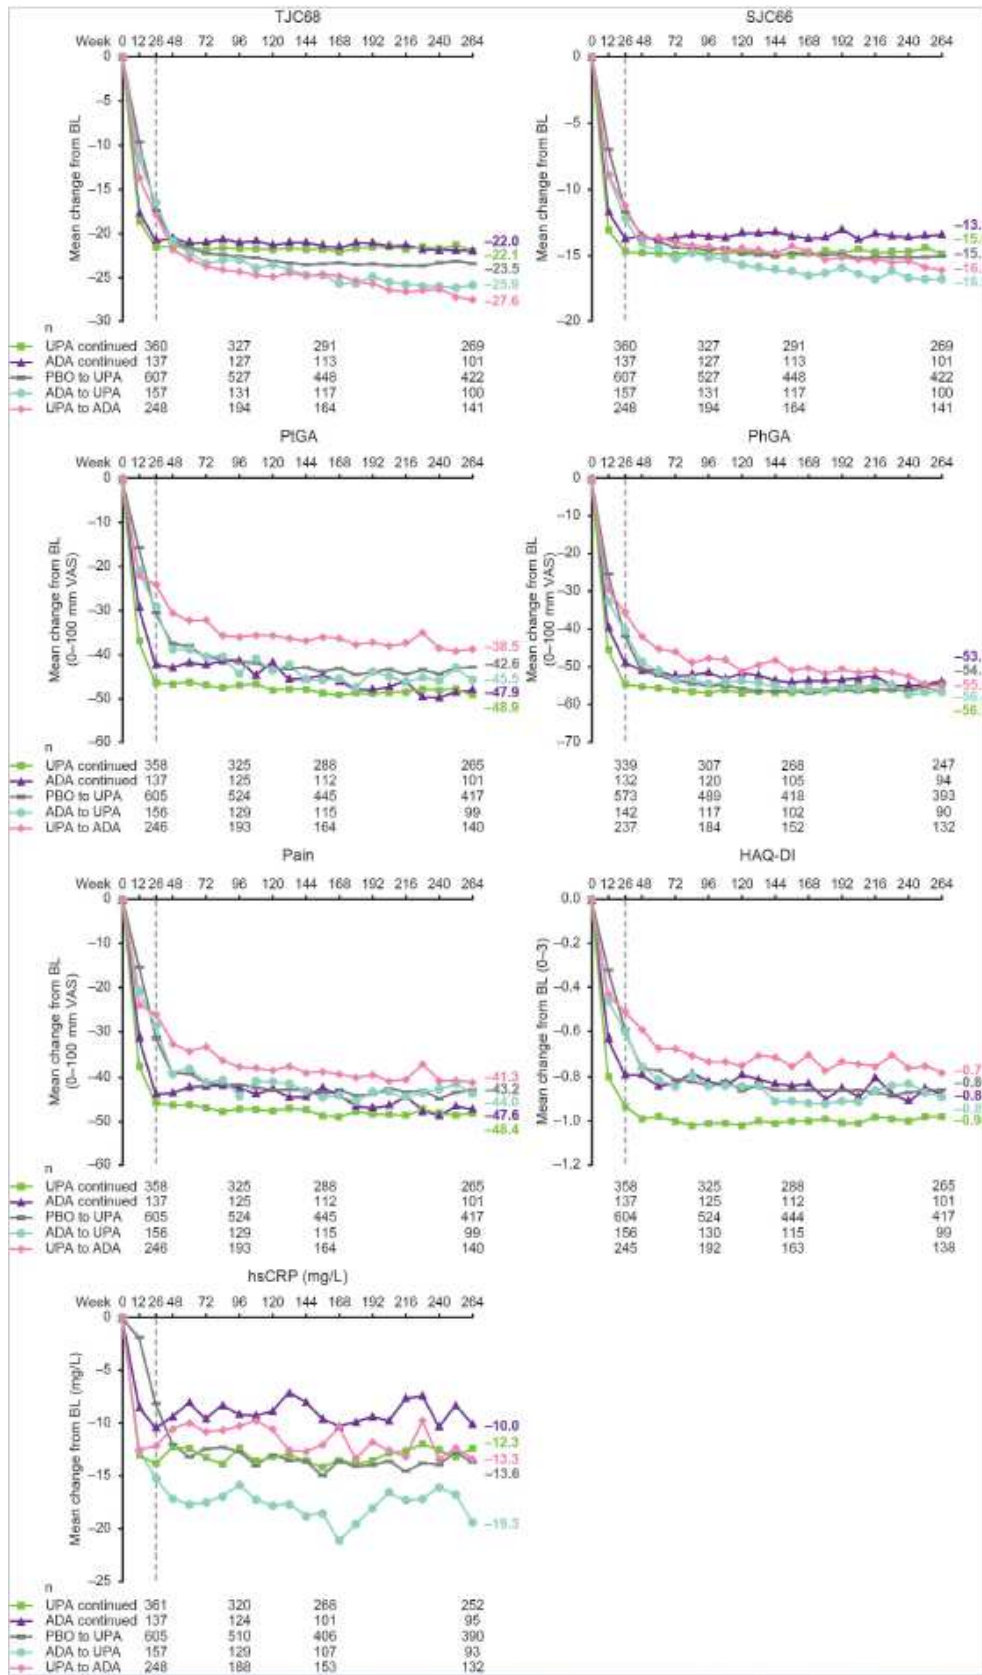

**Supplementary Figure S3** Mean change from BL in core components of ACR criteria through 264 weeks (AO). Groups are by treatment sequence AO, without imputation for missing data. All patients in the PBO group who were not previously rescued were switched to UPA at week 26. Data points plotted here are shown in supplementary table S10. ACR, American College of Rheumatology; ADA, adalimumab; AO, as observed; BL, baseline; HAQ-DI, Health Assessment Questionnaire – Disability Index; hsCRP, high-sensitivity C-reactive protein; PBO, placebo; PhGA, physician’s global assessment of disease activity; PtGA, patient’s global assessment of disease activity; SJC66, swollen joint count based on 66 joints; TJC68, tender joint count based on 68 joints; UPA, upadacitinib; VAS, visual analogue scale.

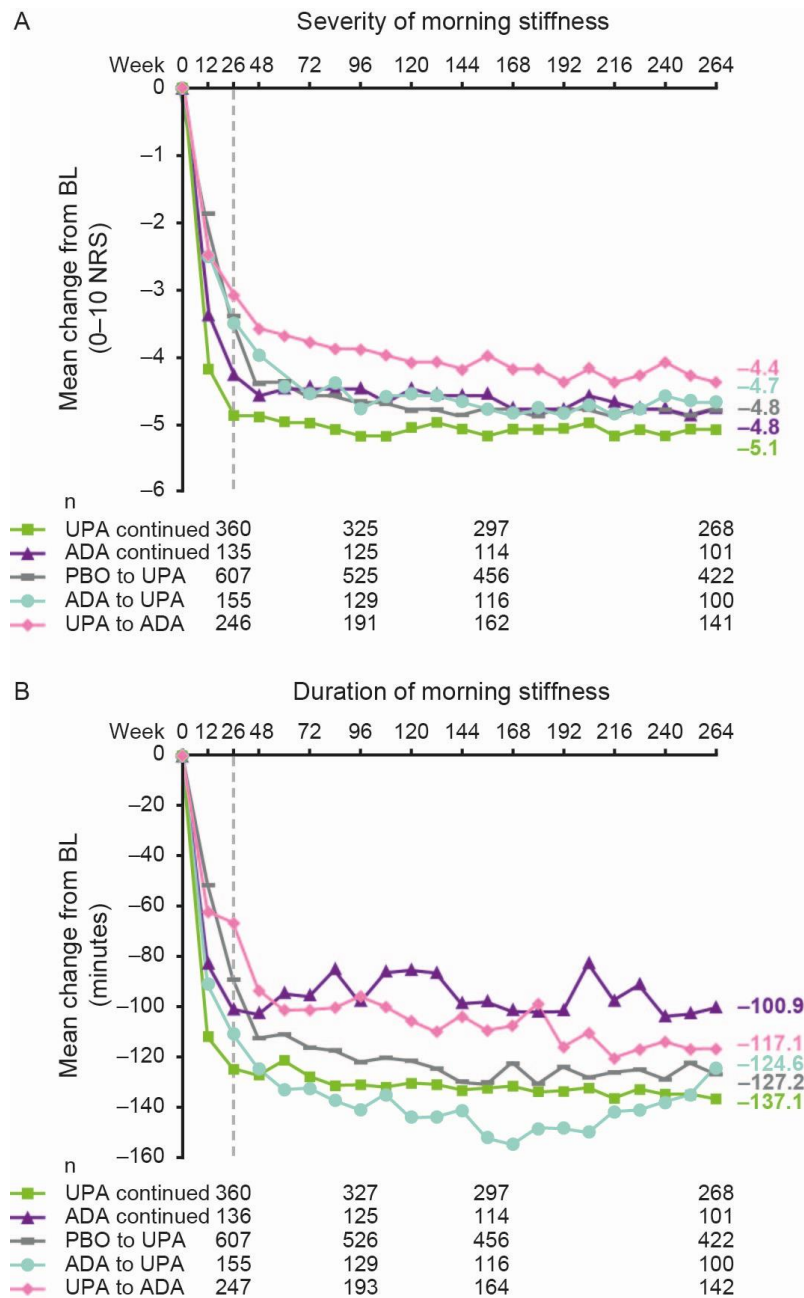

**Supplementary Figure S4** Mean change from baseline in severity and duration of morning stiffness

through 264 weeks (AO). Groups are by treatment sequence AO, without imputation for missing data. All patients in the PBO group who were not previously rescued were switched to UPA at week 26. Data points plotted here are shown in supplementary table S10. ADA, adalimumab; AO, as observed; BL, baseline; NRS, numerical rating scale; PBO, placebo; UPA, upadacitinib.

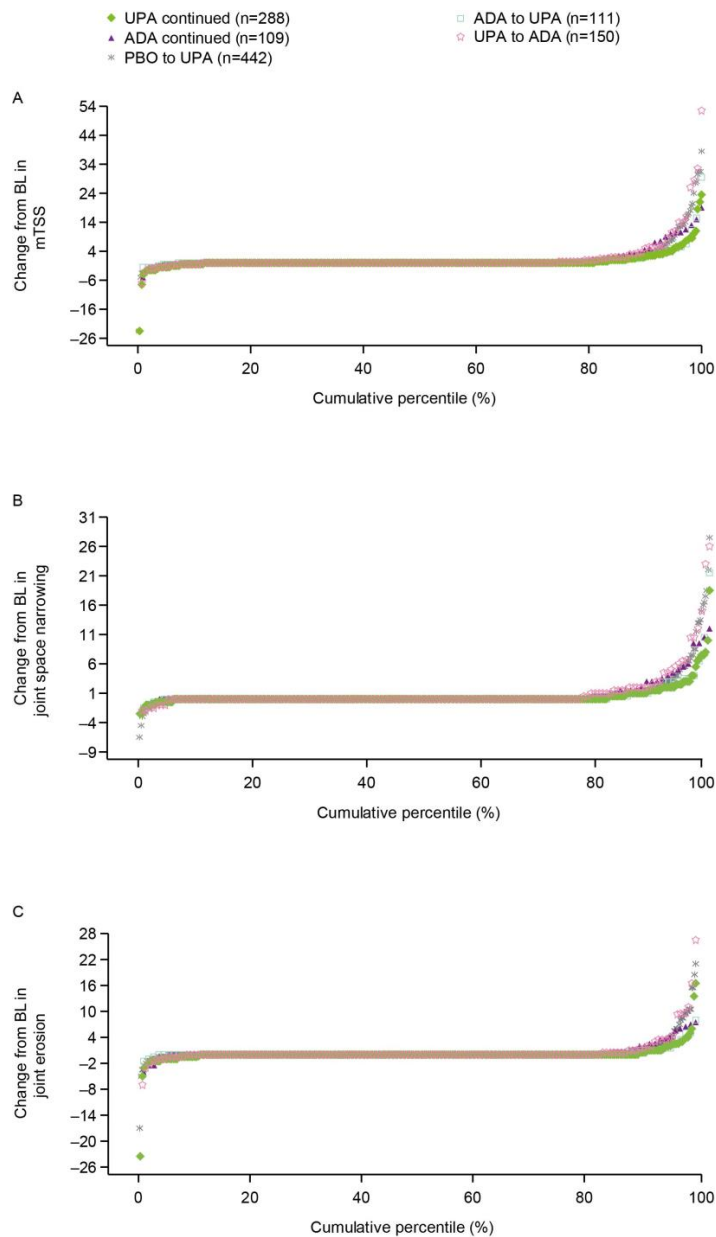

**Supplementary Figure S5** Probability plots of change from baseline in mTSS, joint erosion and joint space narrowing at week 192 (AO). Groups are by treatment sequence AO, without imputation for missing data. All patients in the PBO group who were not previously rescued were switched to UPA at week 26. ADA, adalimumab; AO, as observed; BL, baseline; mTSS, modified Total Sharp Score; PBO, placebo; UPA, upadacitinib.
